# Supplementary material for: Reconstructed cell fate–regulatory programs in stem cells reveal hierarchies and key factors of neurogenesis
Source: HighWire-hosted journal article supplement (doi:10.1101/gr.208926.116), 2016-09-20
Supplement: Supplemental_Fig_S1.pdf [file Supplemental_Fig_S1.pdf]

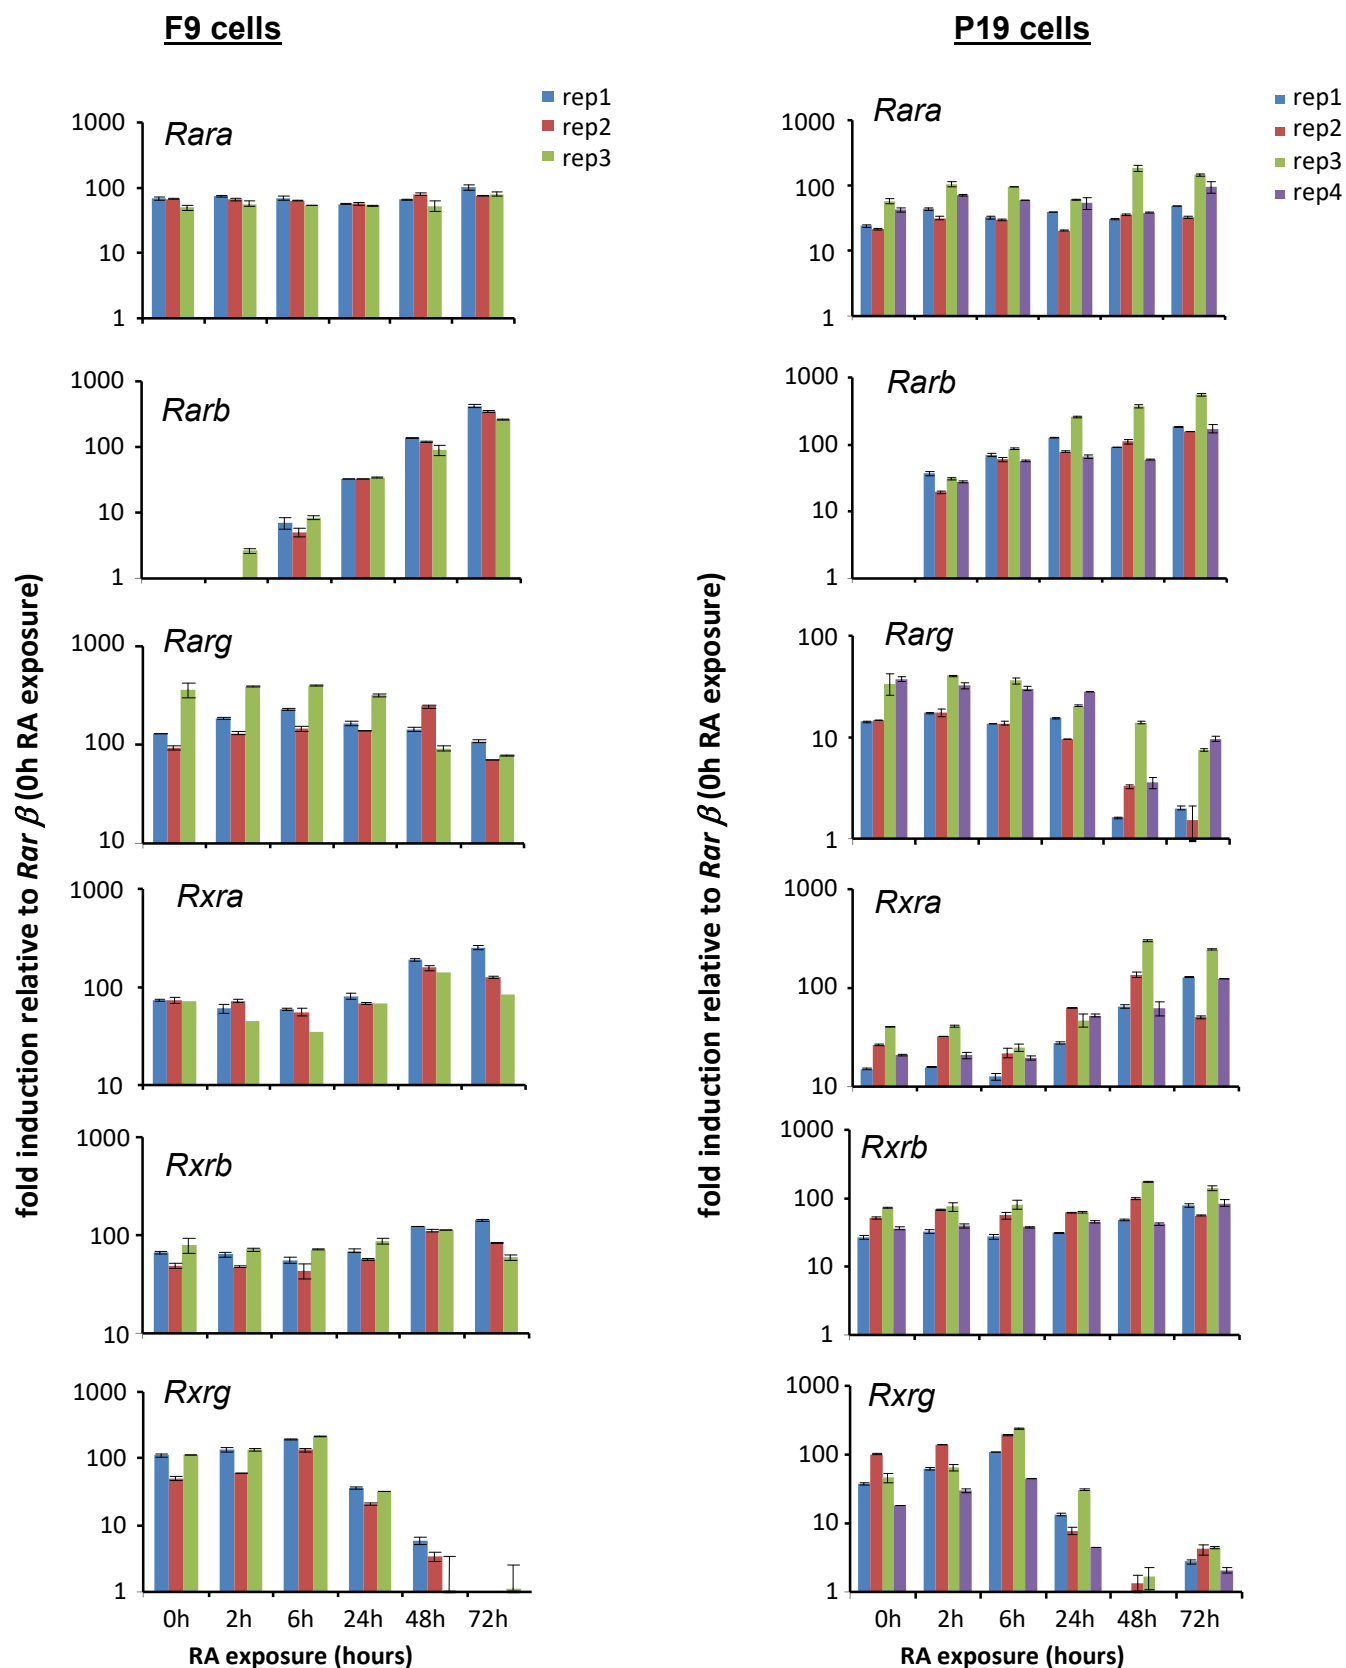

**Supplemental Figure S1: Gene expression levels of Rar and Rxr subtypes in F9 and P19 cells.** Expression levels were determined by RT-qPCR, calculated relative to the constitutively expressed ‘36b4’ gene and represented as fold induction relative to the lowest measurement, which was the expression level assessed for *Rarb* in untreated F9 and P19 cells (0h RA exposure). All RT-qPCR measurements were performed as multiple biological replicates (“rep”).
