# Supplementary material for: Reconstructed cell fate–regulatory programs in stem cells reveal hierarchies and key factors of neurogenesis
Source: HighWire-hosted journal article supplement (doi:10.1101/gr.208926.116), 2016-09-20
Supplement: Supplemental_Fig_S3.pdf [file Supplemental_Fig_S3.pdf]

**A****P19 cells**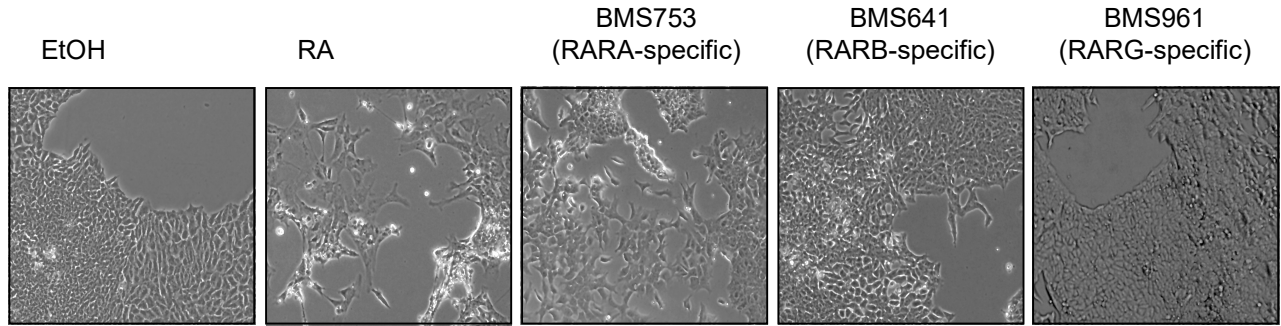**B**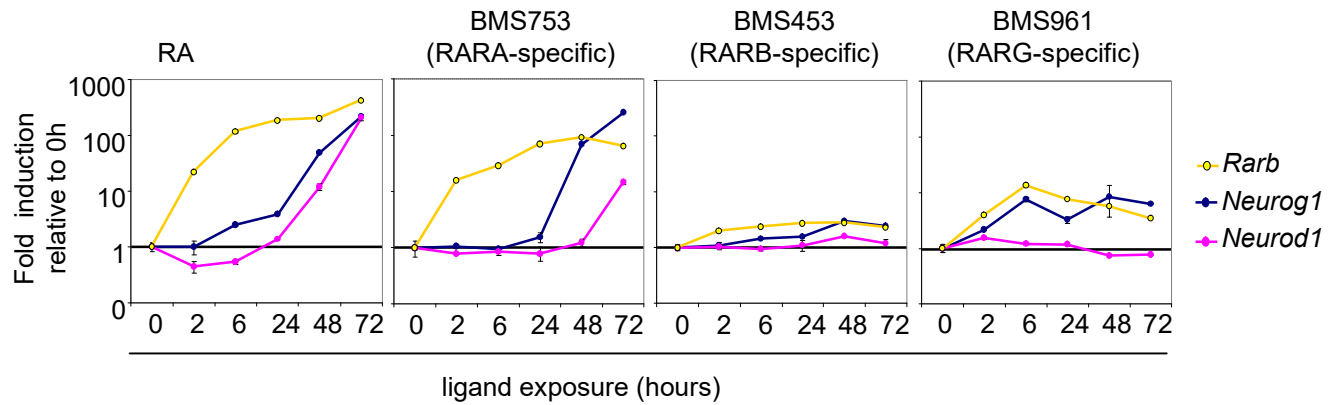

**Supplemental Figure S3: P19 cells differentiate into neuronal precursor cells when treated with RA or RARA-specific agonists.** P19 cells were treated with either RA or the indicated RAR isotype-specific agonists during 72 h in monolayer. **(A)** After 72 h cells treated with RA and the RARA-specific BMS753 presented morphological changes characteristic of neuronal differentiation. **(B)** mRNA expression levels for the neuronal markers neurogenin1 (*Neurog1*) and *Neurod1* as well as for the *Rarb* nuclear receptor. Note that *Neurog1* and *Neurod1* were induced with RA and BMS753 after 24 h of treatment, while BMS453 and BMS961 did not induce a similar response. Furthermore, *Rarb* mRNA induction levels were detected as early as after 2h of RA or BMS753 treatment, while BMS453 and BMS961 did not induce *Rarb* gene expression.
