# Supplementary material for: Reconstructed cell fate–regulatory programs in stem cells reveal hierarchies and key factors of neurogenesis
Source: HighWire-hosted journal article supplement (doi:10.1101/gr.208926.116), 2016-09-20
Supplement: Supplemental_Fig_S4.pdf [file Supplemental_Fig_S4.pdf]

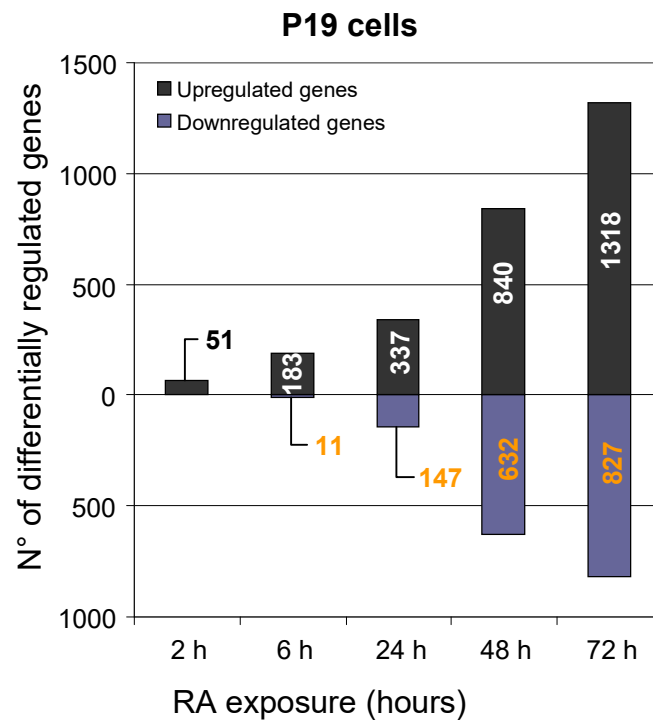

**Supplemental Figure S4: Differentially expressed genes in P19 cells at different time-points during RA treatment.** Y-axis; number of genes responding to RA by induction or repression of mRNA levels relative to untreated cells. X-axis; the time-point at which the gene expression has been assessed. The threshold cut off values used were for up-regulated genes  $\geq 1.8$ -fold and for down-regulated genes  $\leq 0.5$  fold relative to the 0h control time-point.
