# Supplementary material for: Reconstructed cell fate–regulatory programs in stem cells reveal hierarchies and key factors of neurogenesis
Source: HighWire-hosted journal article supplement (doi:10.1101/gr.208926.116), 2016-09-20
Supplement: Supplemental_Fig_S5.pdf [file Supplemental_Fig_S5.pdf]

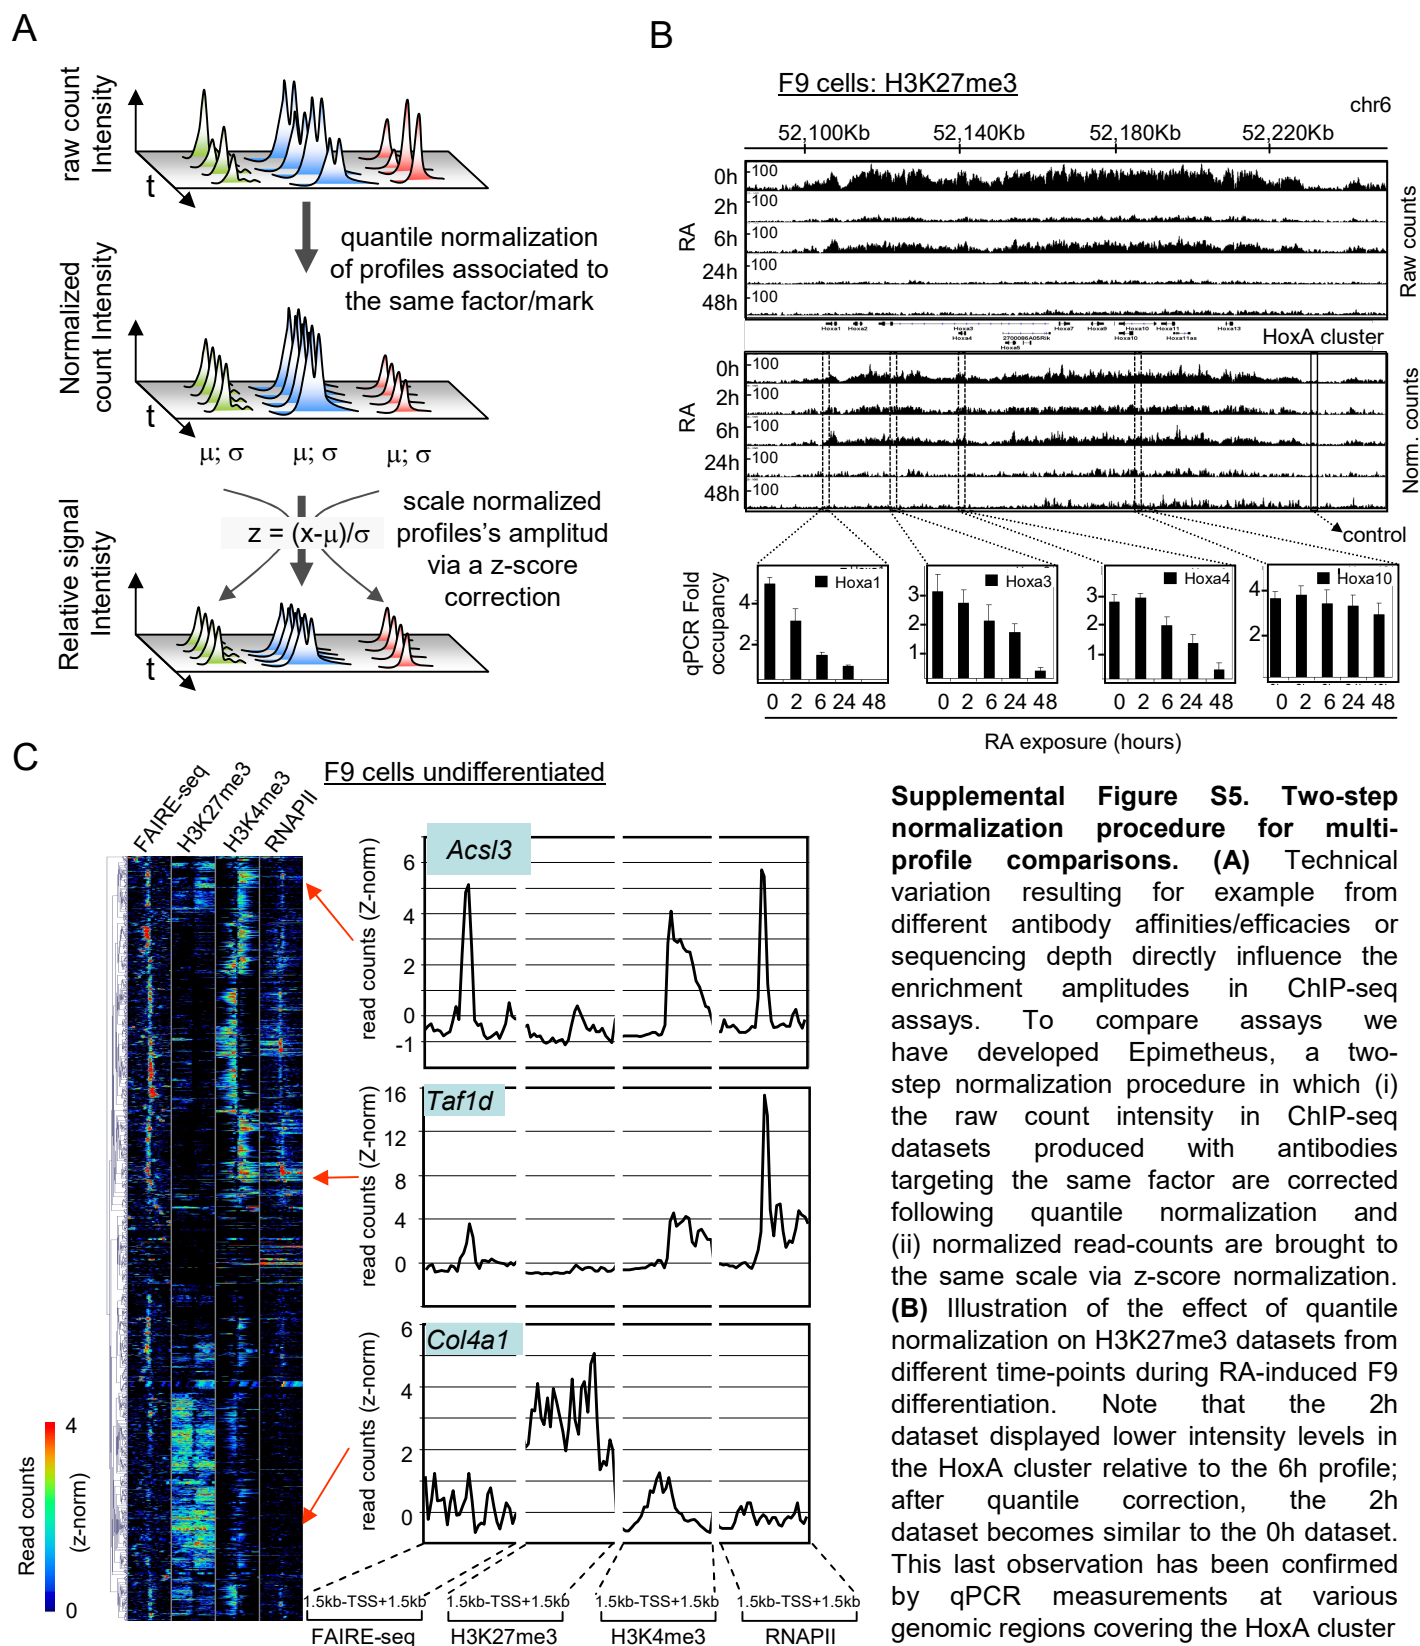

### Supplemental Figure S5. Two-step normalization procedure for multi-profile comparisons.

(A) Technical variation resulting for example from different antibody affinities/efficacies or sequencing depth directly influence the enrichment amplitudes in ChIP-seq assays. To compare assays we have developed Epimetheus, a two-step normalization procedure in which (i) the raw count intensity in ChIP-seq datasets produced with antibodies targeting the same factor are corrected following quantile normalization and (ii) normalized read-counts are brought to the same scale via z-score normalization.

(B) Illustration of the effect of quantile normalization on H3K27me3 datasets from different time-points during RA-induced F9 differentiation. Note that the 2h dataset displayed lower intensity levels in the HoxA cluster relative to the 6h profile; after quantile correction, the 2h dataset becomes similar to the 0h dataset. This last observation has been confirmed by qPCR measurements at various genomic regions covering the HoxA cluster

(C) Example of the z-score scaling correction applied to normalized datasets corresponding to the chromatin accessibility FAIRE-seq profile, the 'repressive' H3K27me3 and the 'active' H3K4me3 marks, and RNA polymerase II (RNAPII). The enrichment levels of these factors around the promoter ( $\pm 1.5$ kb) of genes participating at the RA-induced F9 differentiation process are displayed (left panel, heatmap). The right panel depicts 3 examples of promoter regions in which FAIRE, H3K4me3 and RNAPII are preferentially enriched (*Acs/3*, *Taf1d*) and correlate with an active gene transcription, in contrast to the preferential enrichment of H3K27me3 at the *Col4a1* promoter, which indicates repression.
