# Supplementary material for: Reconstructed cell fate–regulatory programs in stem cells reveal hierarchies and key factors of neurogenesis
Source: HighWire-hosted journal article supplement (doi:10.1101/gr.208926.116), 2016-09-20
Supplement: Supplemental_Fig_S7.pdf [file Supplemental_Fig_S7.pdf]

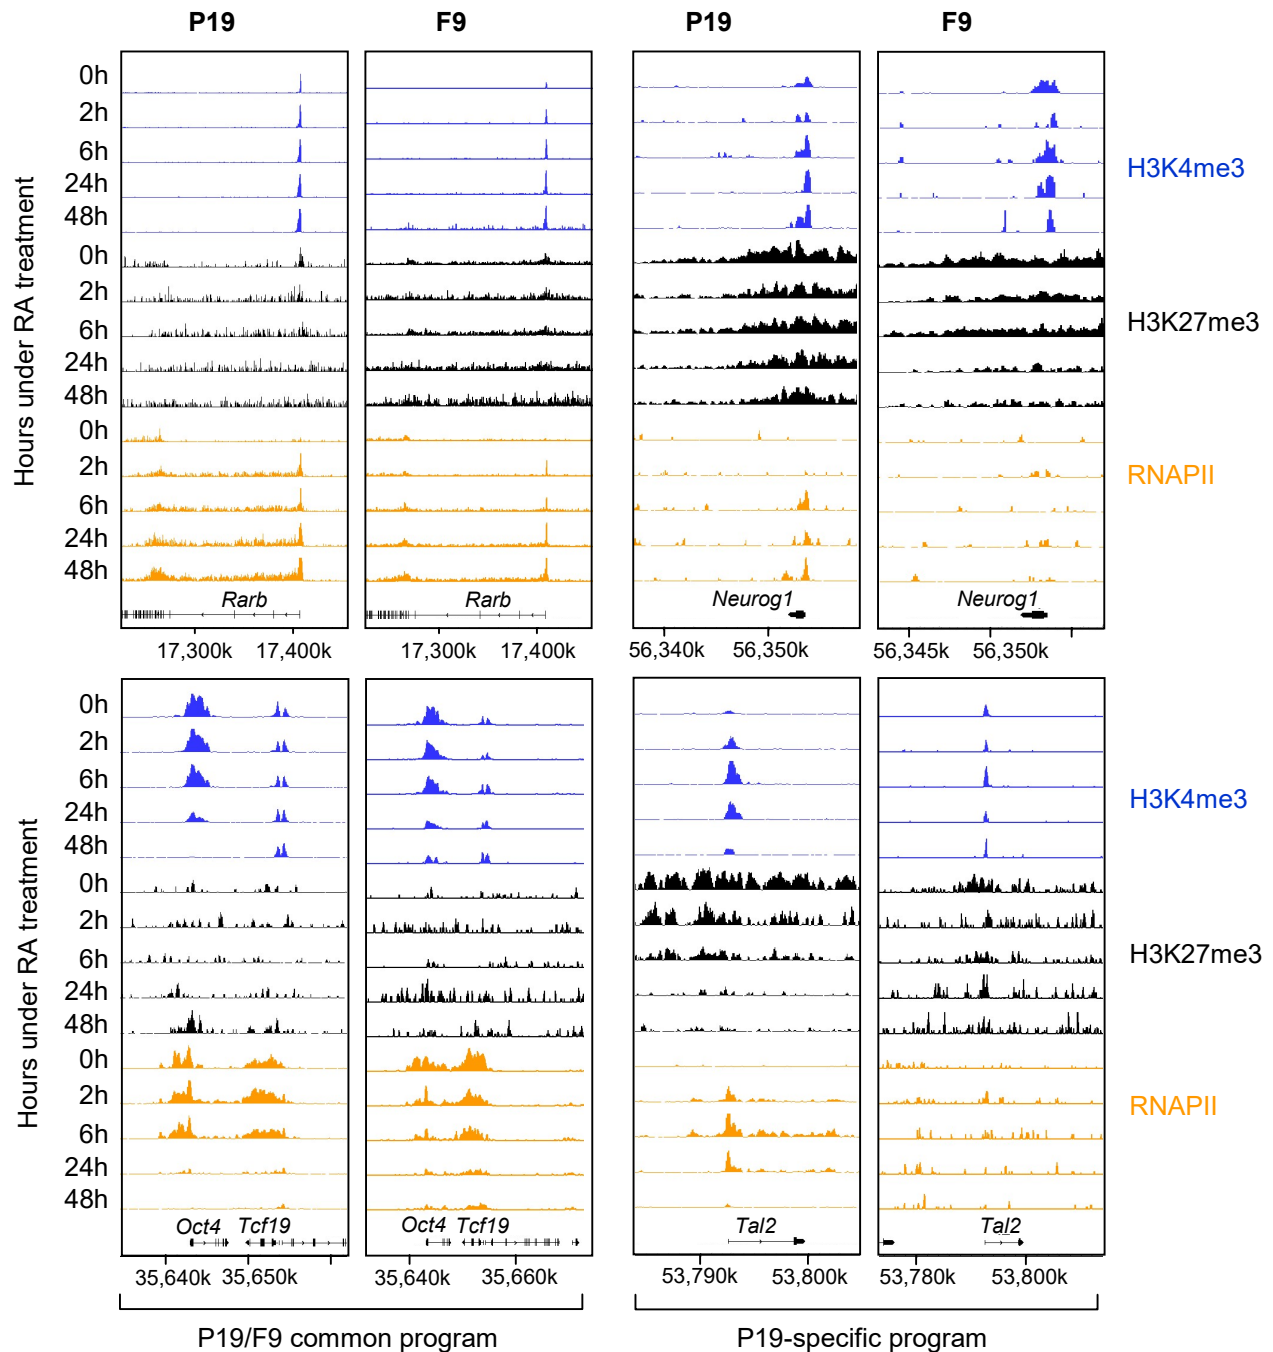

**Supplemental Figure S7. Screenshots revealing the dynamics of RA-induced epigenome and RNAPII binding during F9 and P19 differentiation.** The chromatin environment of genes commonly regulated in F9 and P19 cells (*Rarb*, *Pou5f1* (also known as *Oct4*)), as well as P19-specific genes (*Neurog1*, *Tal2*) are displayed in the context of the dynamics and cell-type specific enrichment of the 'repressive' histone mark H3K27me3, the 'active' mark H3K4me3 and the chromatin association of RNA polymerase II ("RNAPII").
