# Supplementary material for: Reconstructed cell fate–regulatory programs in stem cells reveal hierarchies and key factors of neurogenesis
Source: HighWire-hosted journal article supplement (doi:10.1101/gr.208926.116), 2016-09-20
Supplement: Supplemental_Fig_S8.pdf [file Supplemental_Fig_S8.pdf]

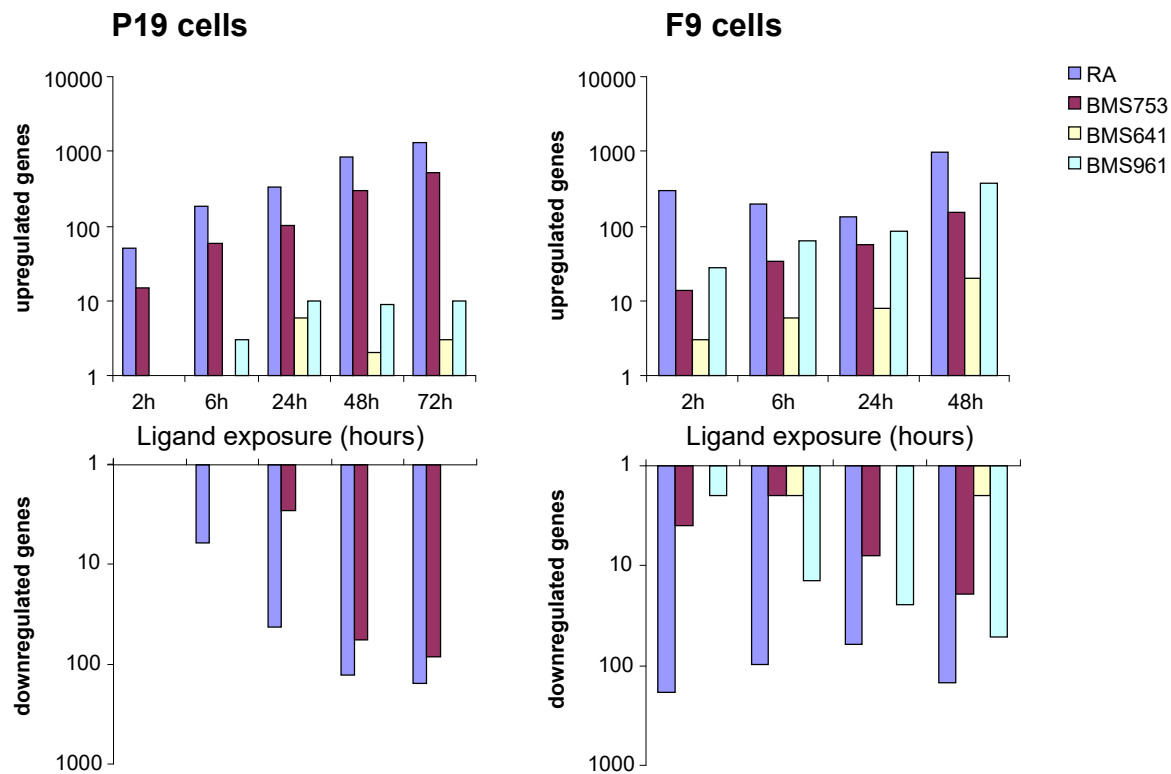

**Supplemental Figure S8: Transcriptional response of P19 and F9 cells to RA and RAR subtype-specific agonists.** Displayed is the number of genes with RA-dependent dynamically regulated mRNA levels (relative to untreated cells) compared with those observed in presence of one of the RAR subtype-specific agonists (BMS753, BMS641, BMS961). Note that in P19 cells most of the genes differentially expressed upon RA exposure are also induced with the RARA-specific BMS753, while only a few of them respond to BMS641 or BMS961. In contrast in F9 cells, the RARG-specific BMS961 presents the most similar gene expression response to that observed with RA. Thresholds are for up-regulated genes  $\geq 1.8$ -fold and for down-regulated genes  $\leq 0.5$  fold relative to the 0h control.
