# Supplementary material for: Reconstructed cell fate–regulatory programs in stem cells reveal hierarchies and key factors of neurogenesis
Source: HighWire-hosted journal article supplement (doi:10.1101/gr.208926.116), 2016-09-20
Supplement: Supplemental_Fig_S11.pdf [file Supplemental_Fig_S11.pdf]

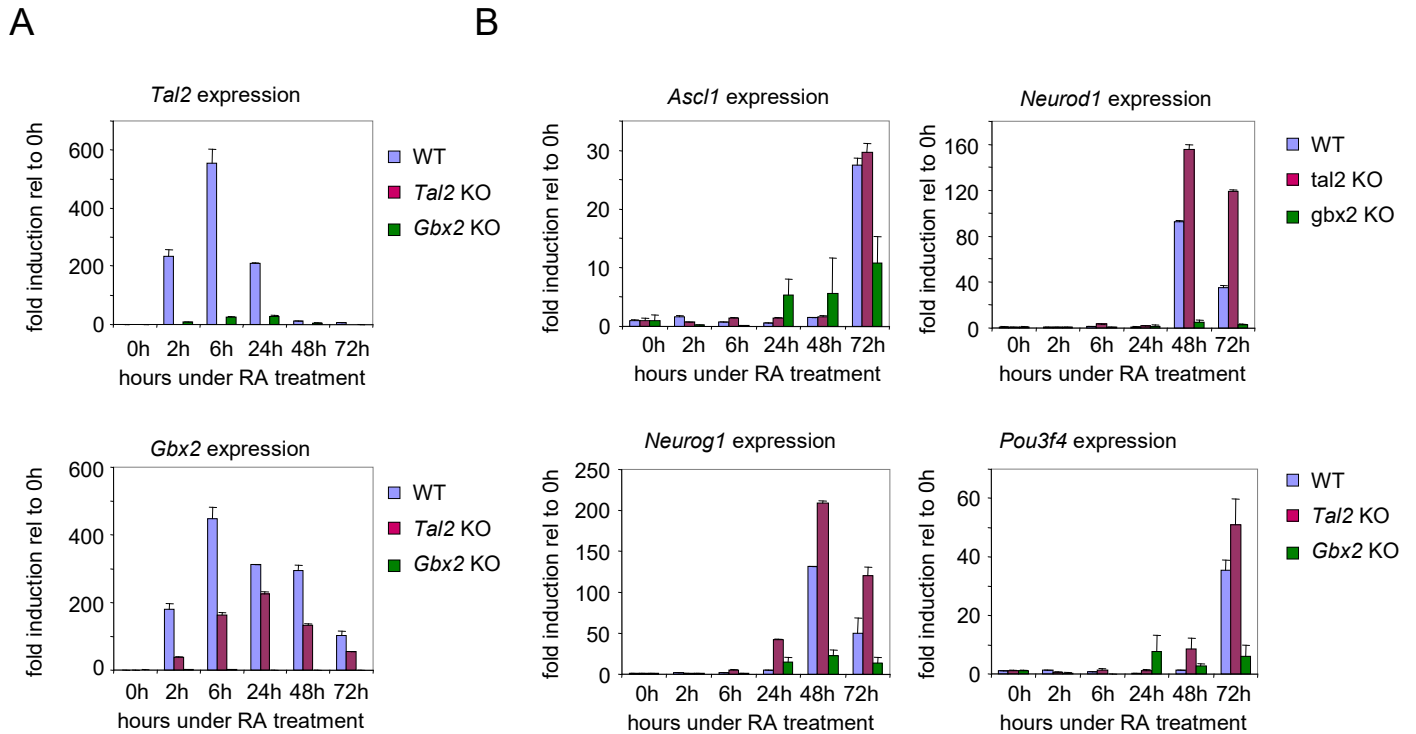

**Supplemental Fig. S11. Effect of *Tal2* and *Gbx2* knockout on expression of neuronal genes in P19.**

Top and bottom panels in **(A)** illustrate the absence of *Tal2* or *Gbx2* expression in *Tal2* or *Gbx2* KO cells, respectively, assessed at the indicated time-points during 72h of RA treatment. Panels in **(B)** illustrate the transcription induction dynamics of 4 neuronal markers in wild-type ("WT") and *Tal2* or *Gbx2* KO cells. Note that only the *Gbx2* KO cells present significantly reduced expression levels for the evaluated neuronal markers. Expression levels are depicted as fold induction relative to the 0h time-point after signal normalization relative to the expression of the constitutive *36B4* gene.
