# Supplementary material for: Reconstructed cell fate–regulatory programs in stem cells reveal hierarchies and key factors of neurogenesis
Source: HighWire-hosted journal article supplement (doi:10.1101/gr.208926.116), 2016-09-20
Supplement: Supplemental_Fig_S12.pdf [file Supplemental_Fig_S12.pdf]

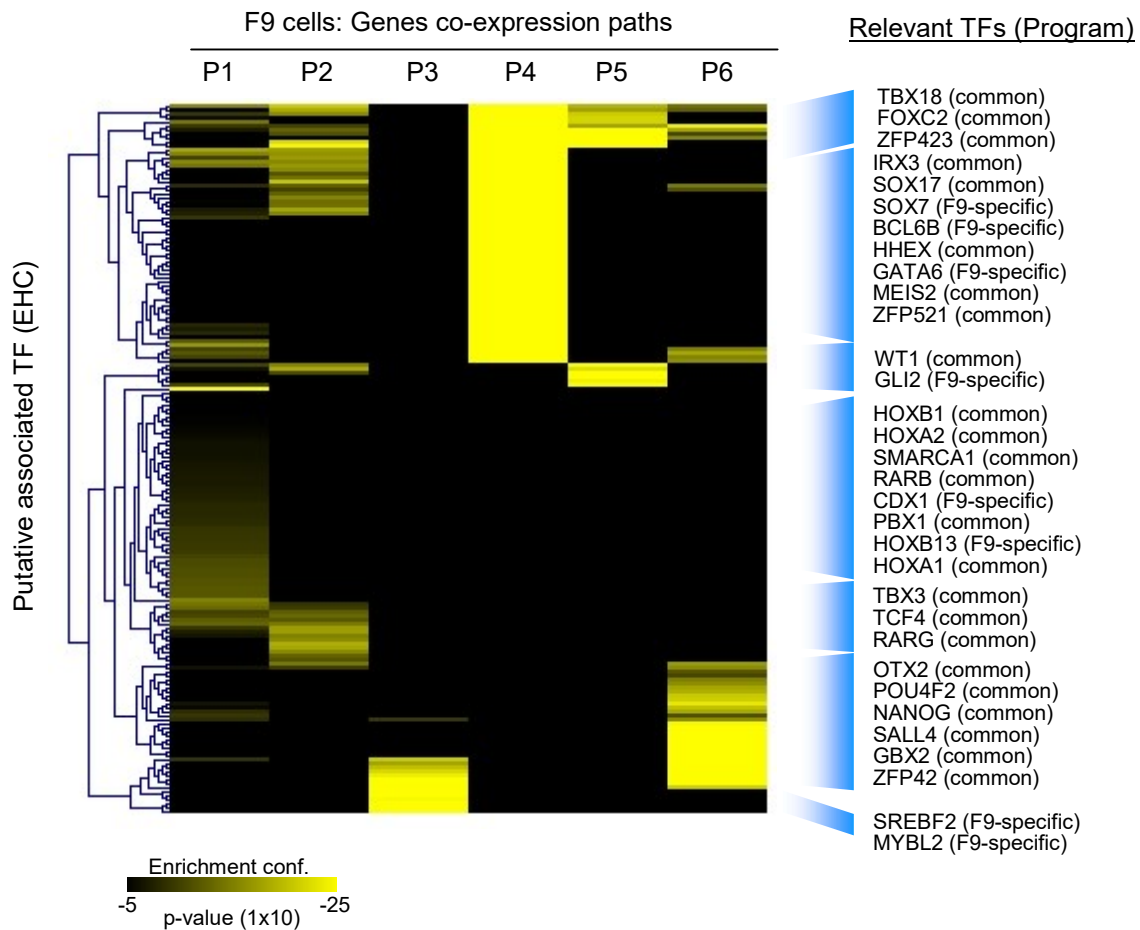

**Supplemental Figure S12: Relevant TFs predicted by DREM and CellNet for the RA-induced endodermal differentiation of F9 cells.** Relevant TFs (*Euclidean* hierarchical clustering) are identified by their target enrichment per co-expression path (enrichment >10%) and their associated enrichment confidence p-value (hyper-geometric distribution model).
