# Supplementary material for: Reconstructed cell fate–regulatory programs in stem cells reveal hierarchies and key factors of neurogenesis
Source: HighWire-hosted journal article supplement (doi:10.1101/gr.208926.116), 2016-09-20
Supplement: Supplemental_Fig_S14.pdf [file Supplemental_Fig_S14.pdf]

## P19 cells

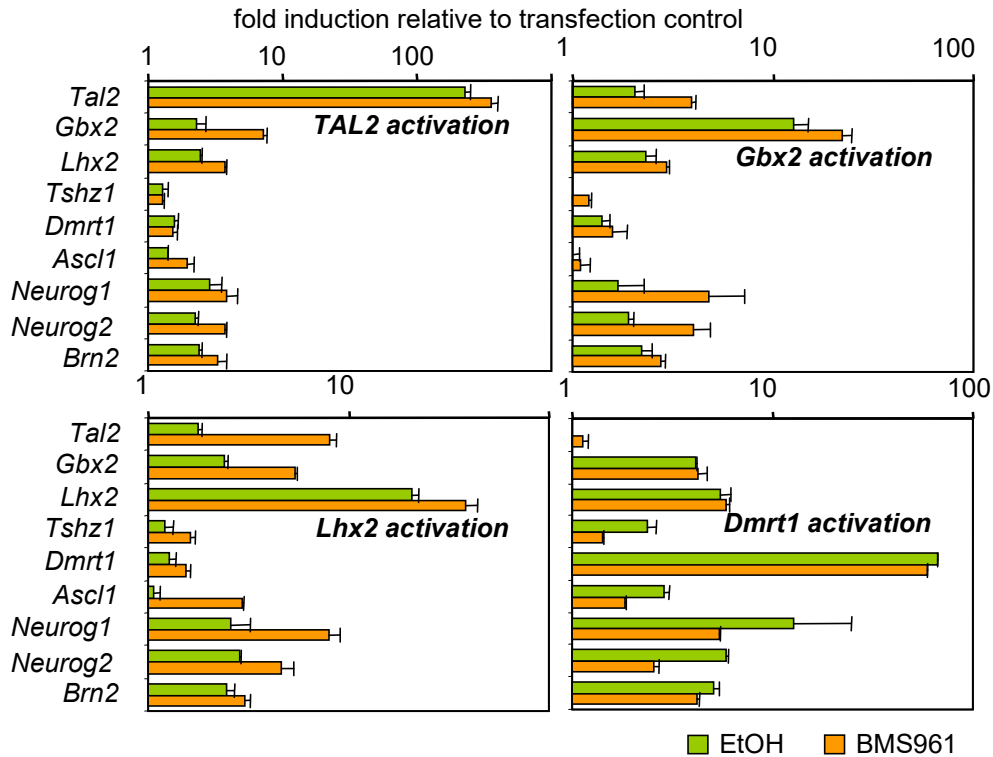

**Supplemental Figure S14: Neuronal cell fate induction by CRISPR/dCas9 activation in P19 cells.** mRNA gene expression for each of the depicted factors in Figure 6D assessed after CRISPR/dCas9-mediated transcription activation of *Tal2*, *Gbx2*, *Lhx2* or *Dmrt1* in presence or absence of the RAR $\gamma$ -specific BMS961. The engineered transcription induction of each of these factors induced partial responses of the other factors, particularly those known as neuronal markers.
