# Supplementary material for: Reconstructed cell fate–regulatory programs in stem cells reveal hierarchies and key factors of neurogenesis
Source: HighWire-hosted journal article supplement (doi:10.1101/gr.208926.116), 2016-09-20
Supplement: Supplemental_Fig_S15.pdf [file Supplemental_Fig_S15.pdf]

A

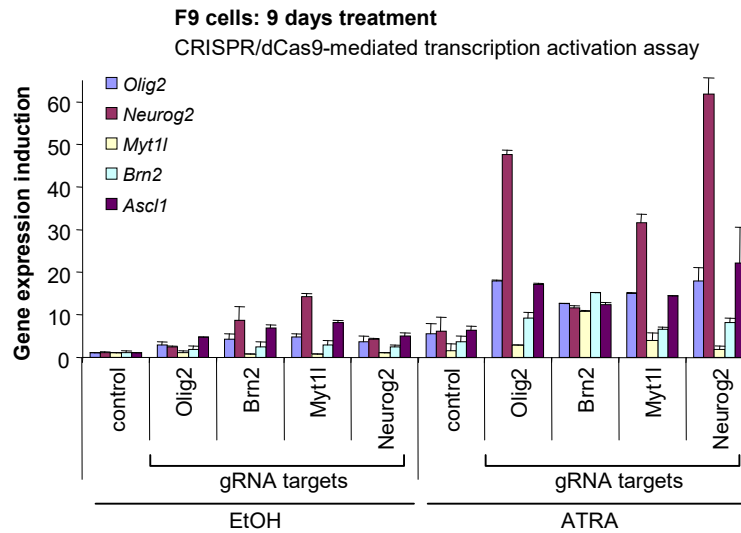

B

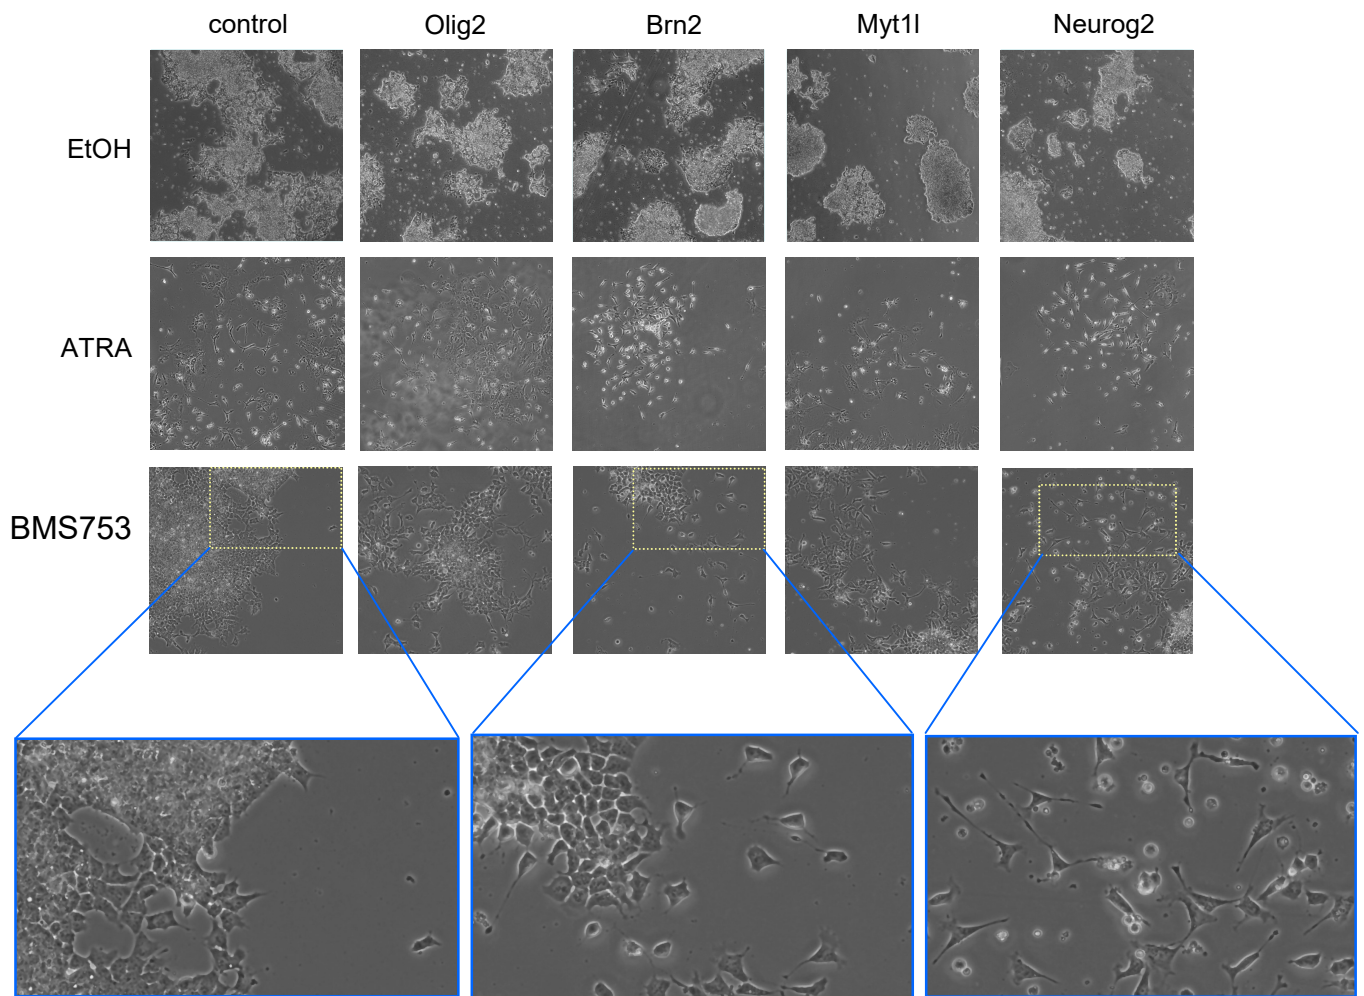

**Supplemental Figure S15. CRISPR/dCas9-mediated transcription activation of neuronal factors in F9 cells. (A)** Gene induction as consequence of the transfection of F9 cells with CRISPR/dCas9 constructs targeting the (silent) neuronal factors followed by either vehicle (EtOH) or ATRA treatment (9 days). Note that in most cases the response is significantly higher in the presence of ATRA. **(B)** Morphological changes observed in F9 cells as a consequence of the CRISPR/dCas9 transfection assay in presence of EtOH, ATRA or the RARA agonist BMS753.
