# Supplementary material for: Reconstructed cell fate–regulatory programs in stem cells reveal hierarchies and key factors of neurogenesis
Source: HighWire-hosted journal article supplement (doi:10.1101/gr.208926.116), 2016-09-20
Supplement: Supplemental_Fig_S17.pdf [file Supplemental_Fig_S17.pdf]

**Supplemental Figure S17. Gene regulatory wiring reconstructed from the reduced Gene regulatory network governing the RA-driven cell-fate decisions in F9 and P19 cells.**

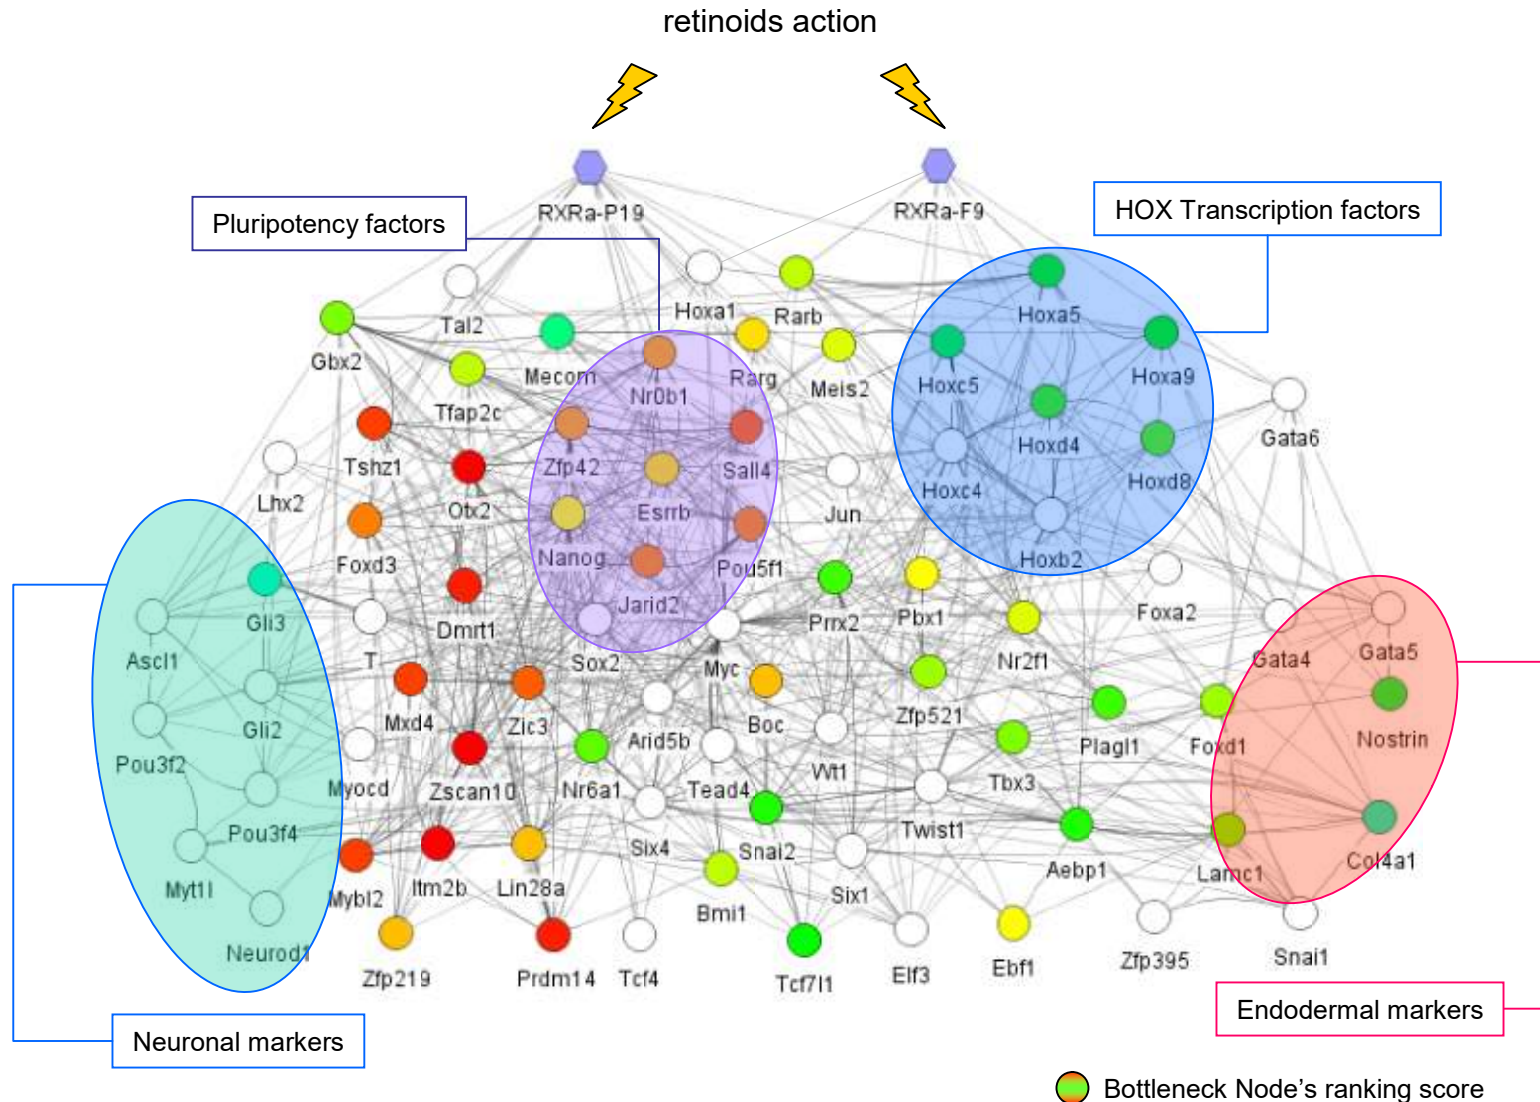

The reduced GRN comprising 80 nodes and 626 edges was reconstructed by applying topological ranking to identify key connector nodes (bottleneck node's ranking score; displayed as heatmap). Four major sub-networks associated with cell pluripotency, HOX factors and neuronal or endodermal cell fate markers are highlighted. A detailed view of the connectivity between these major sub-networks is provided below.

**Supplemental Figure S17. Gene regulatory wiring reconstructed from the reduced Gene regulatory network governing the RA-driven cell-fate decisions in F9 and P19 cells.**

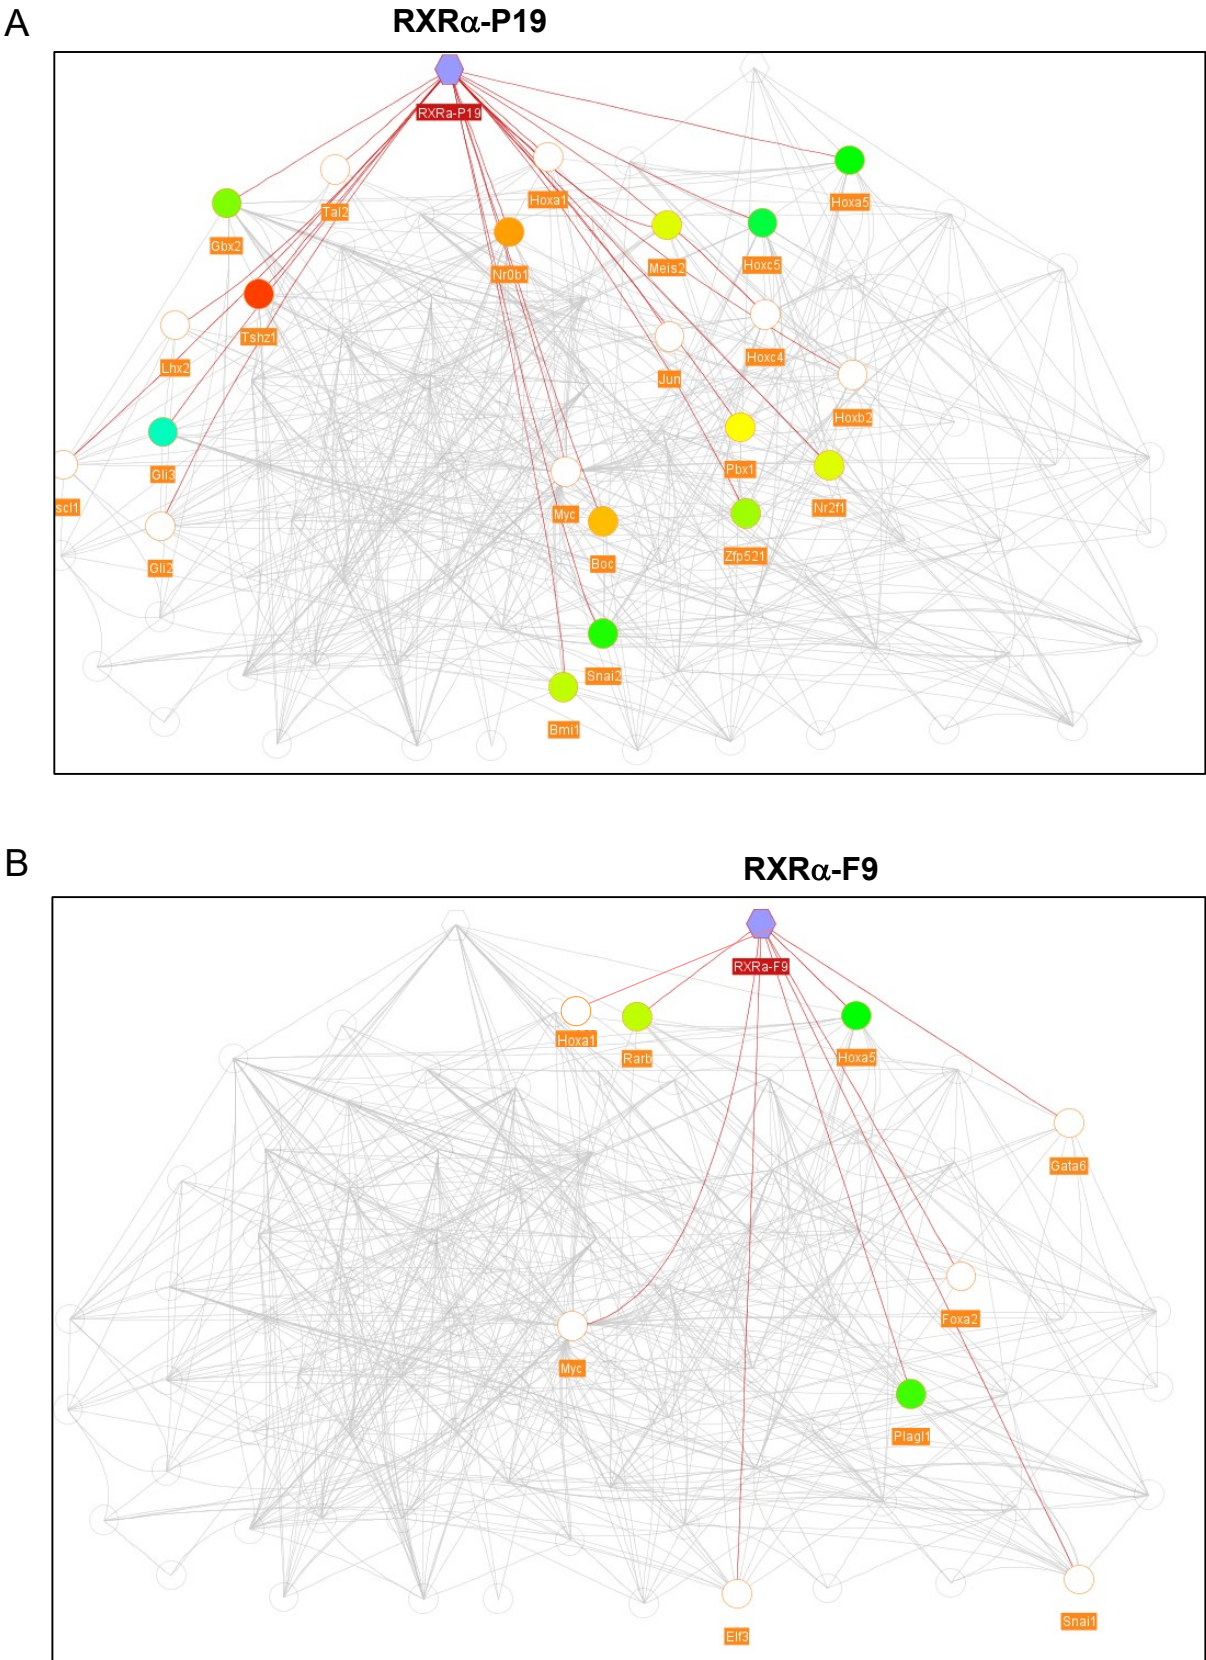



**Supplemental Figure S17. Gene regulatory wiring reconstructed from the reduced Gene regulatory network governing the RA-driven cell-fate decisions in F9 and P19 cells.**

**C**

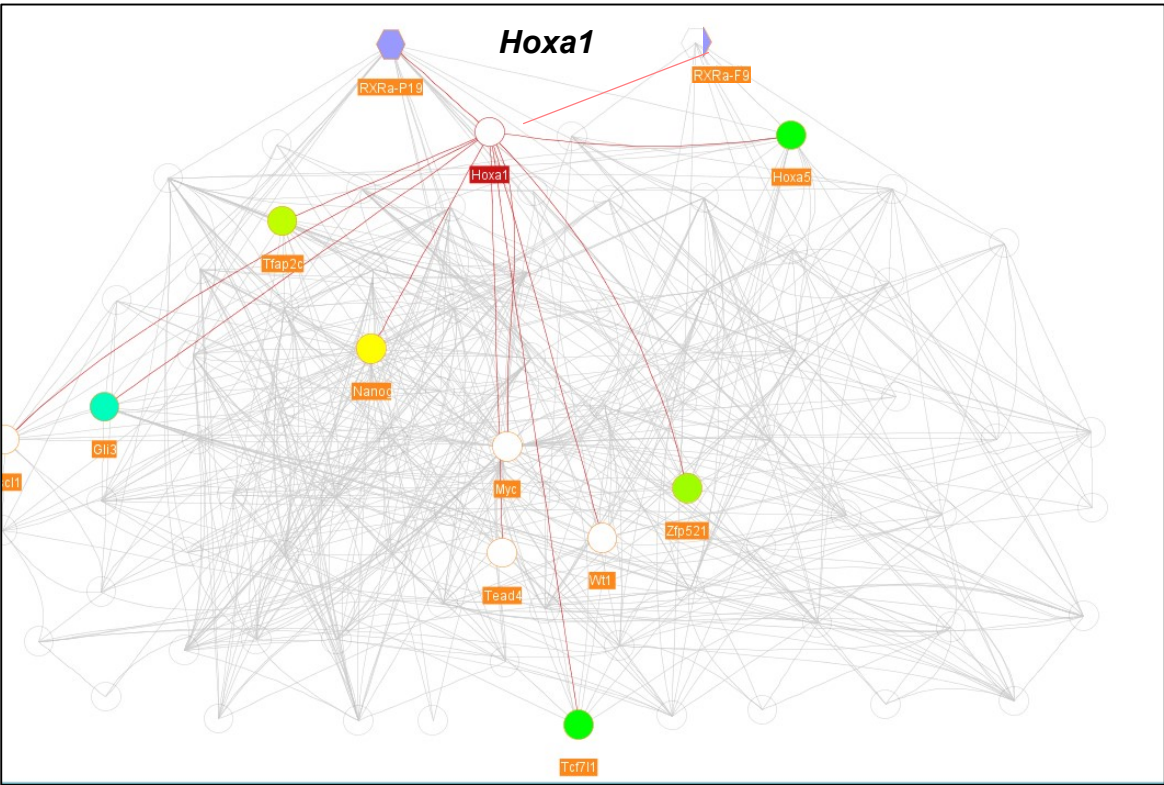

**D**

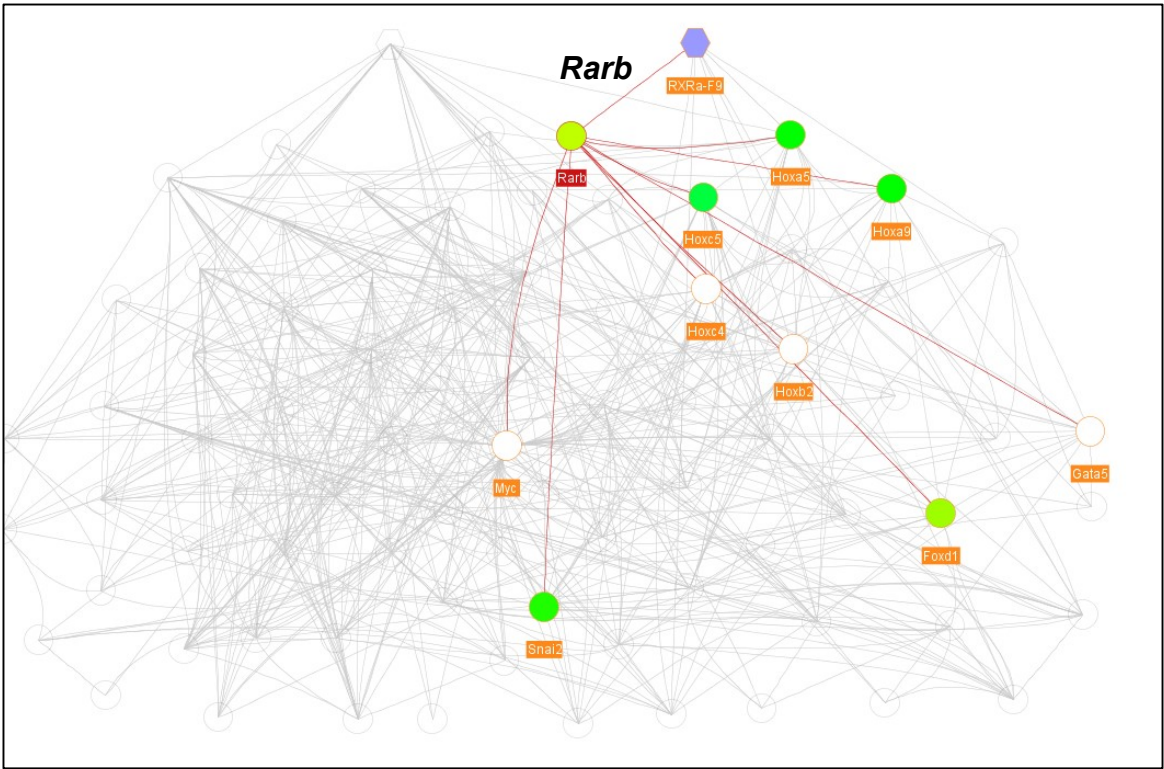

E

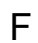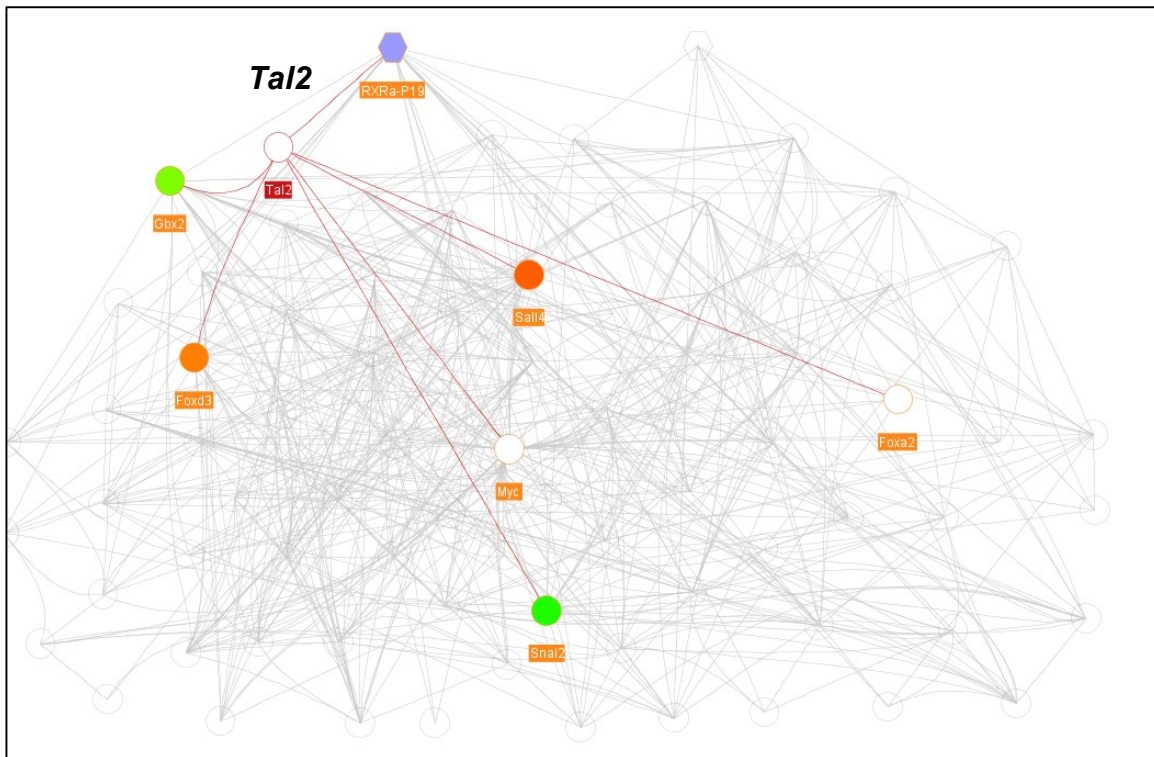



Supplemental Figure S17. Gene regulatory wiring reconstructed from the reduced Gene regulatory network governing the RA-driven cell-fate decisions in F9 and P19 cells.

G

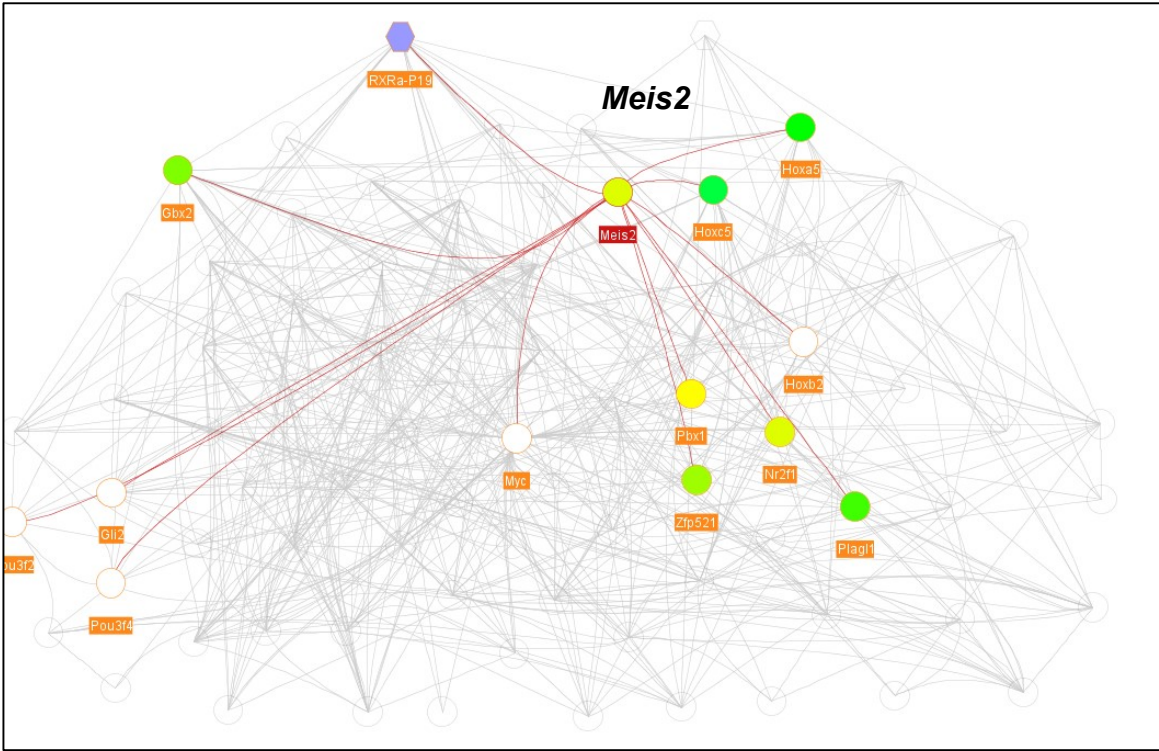

H

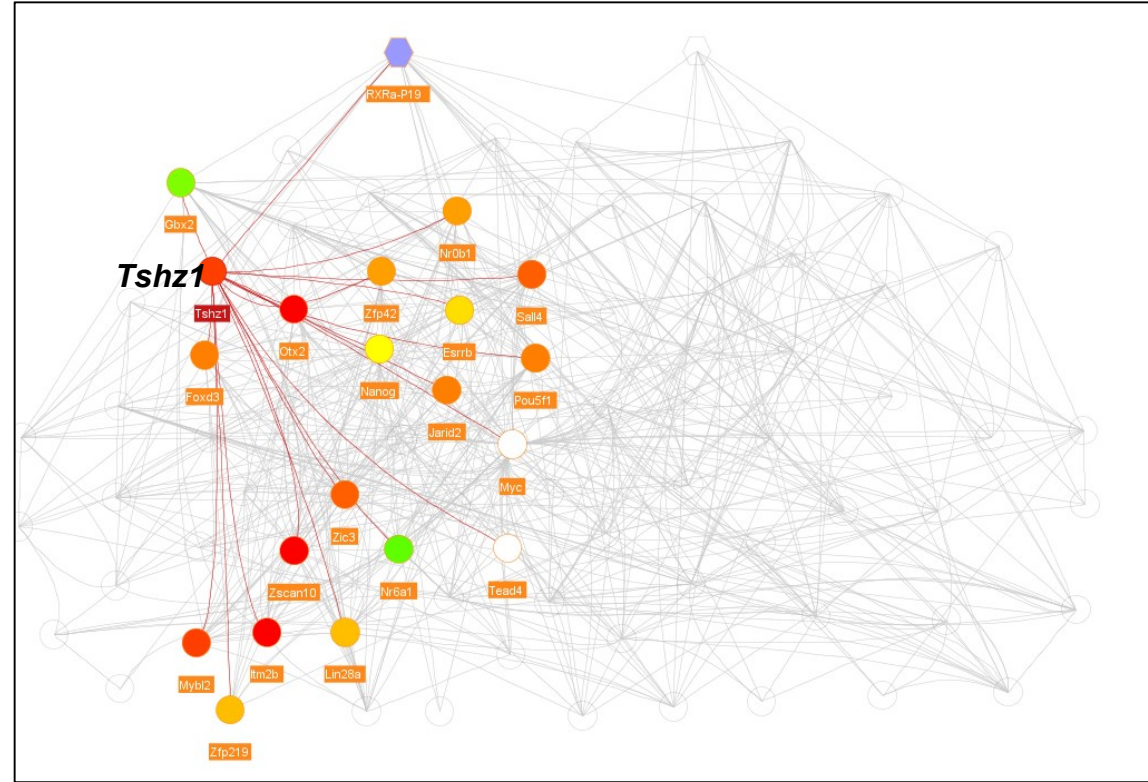

**Supplemental Figure S17. Gene regulatory wiring reconstructed from the reduced Gene regulatory network governing the RA-driven cell-fate decisions in F9 and P19 cells.**

I

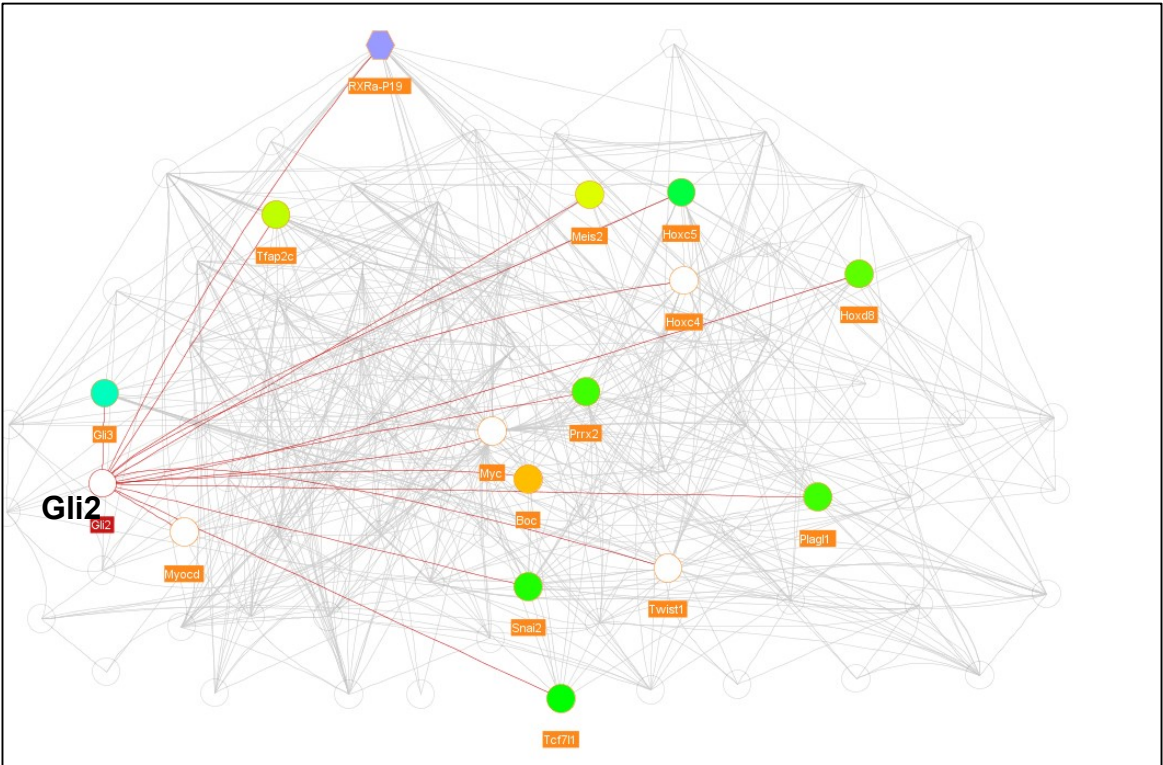

J

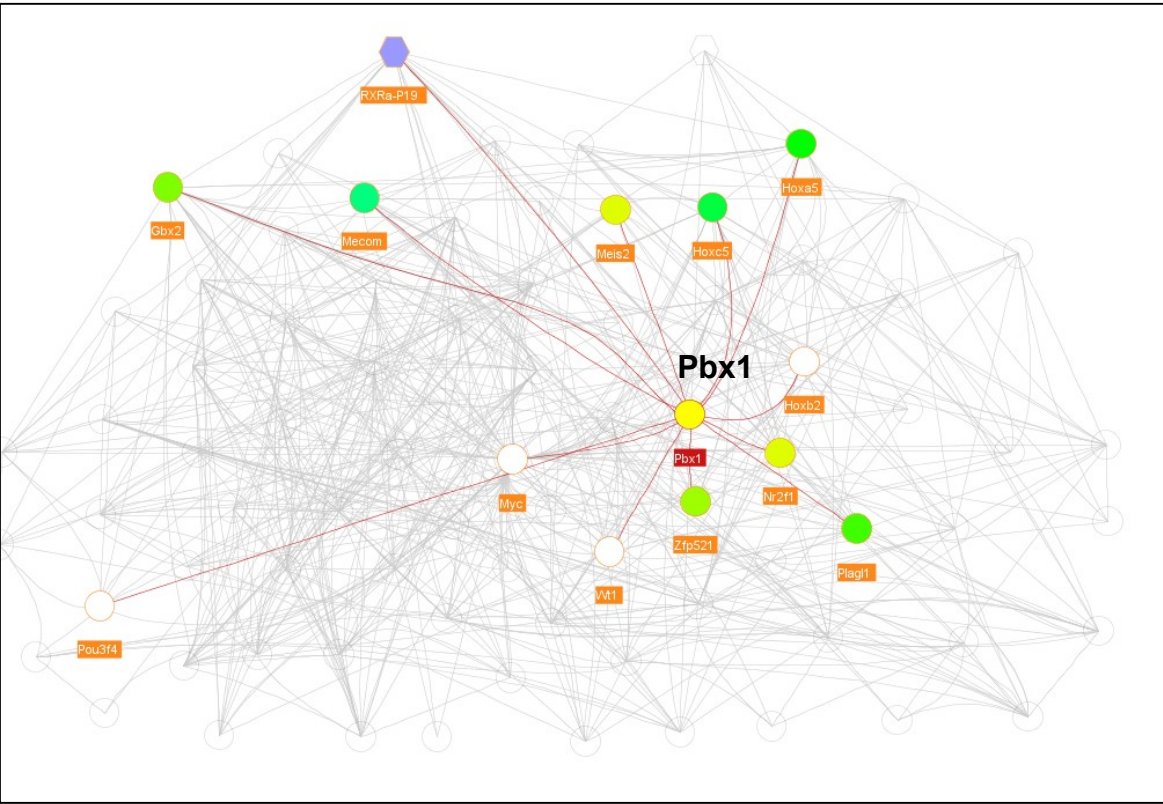



**Supplemental Figure S17. Gene regulatory wiring reconstructed from the reduced Gene regulatory network governing the RA-driven cell-fate decisions in F9 and P19 cells.**

**K**

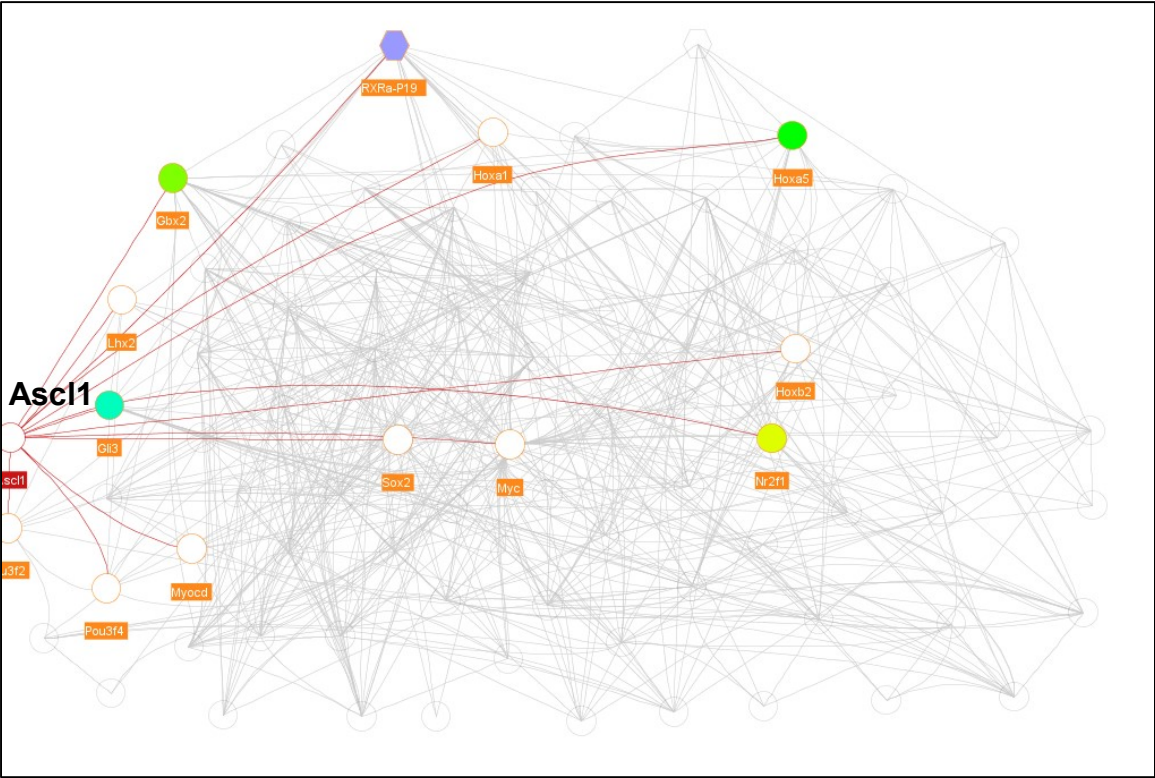

**L**

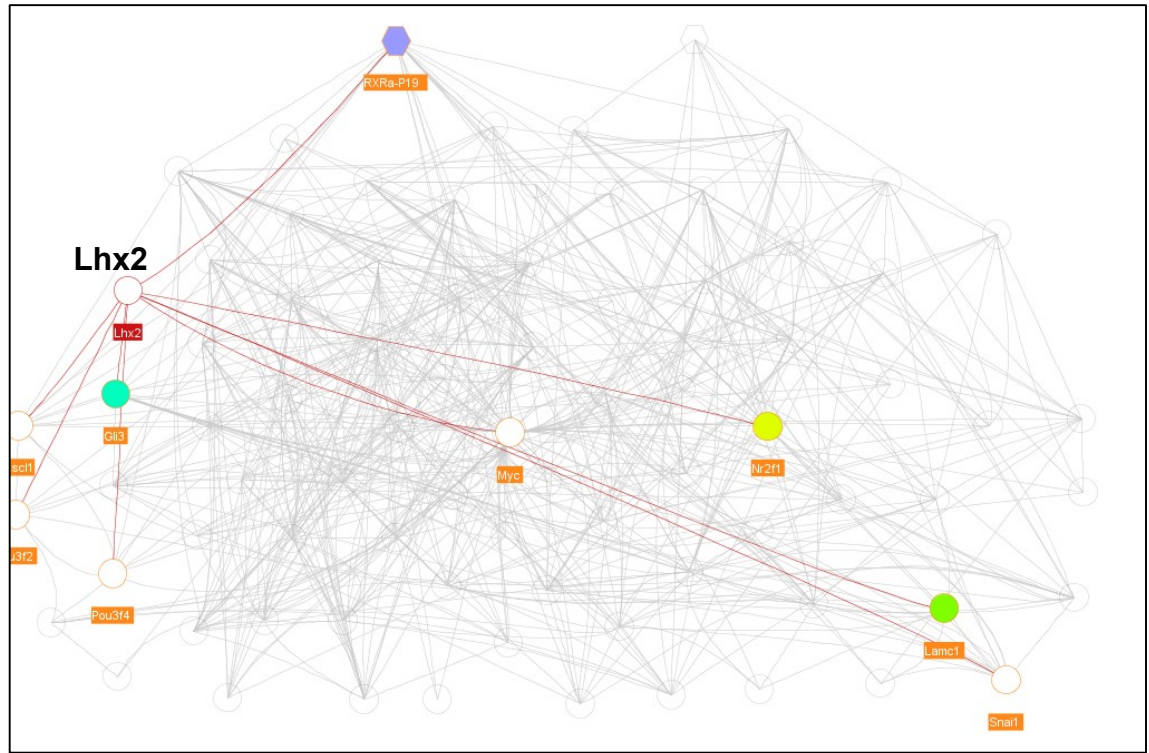

**Supplemental Figure S17. Gene regulatory wiring reconstructed from the reduced Gene regulatory network governing the RA-driven cell-fate decisions in F9 and P19 cells.**

**M**

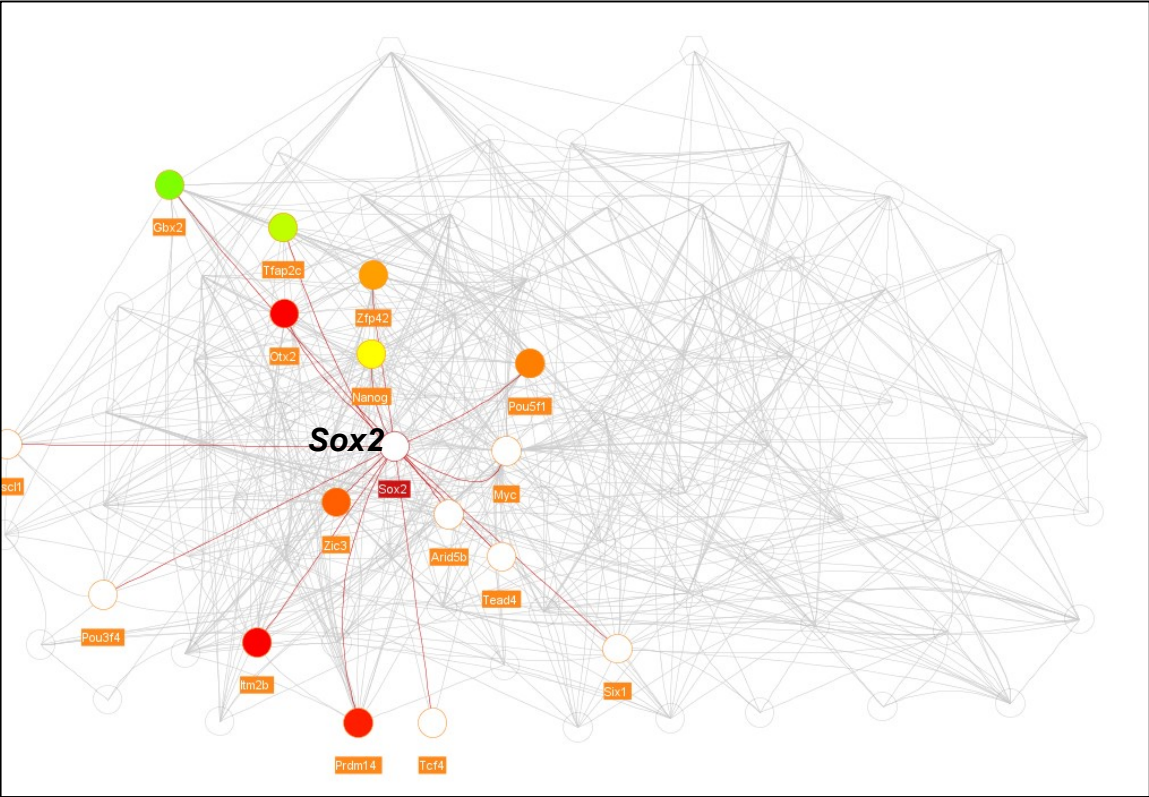

**N**

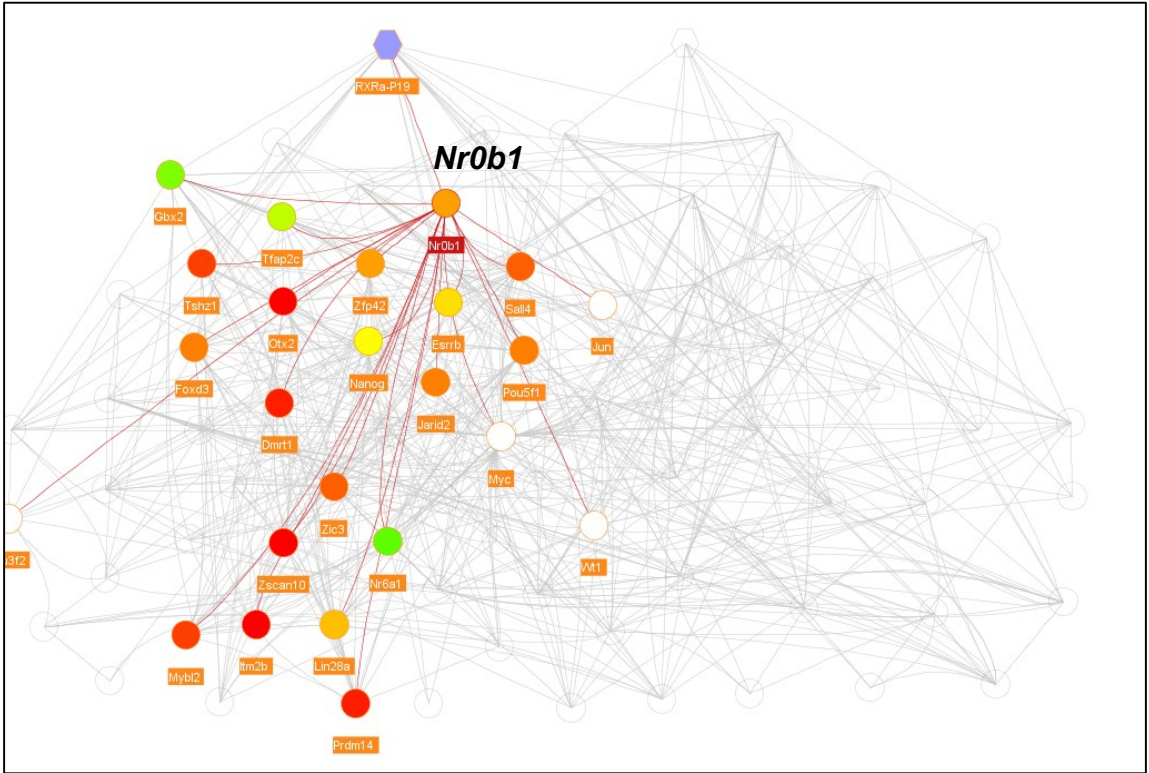



Supplemental Figure S17. Gene regulatory wiring reconstructed from the reduced Gene regulatory network governing the RA-driven cell-fate decisions in F9 and P19 cells.

O

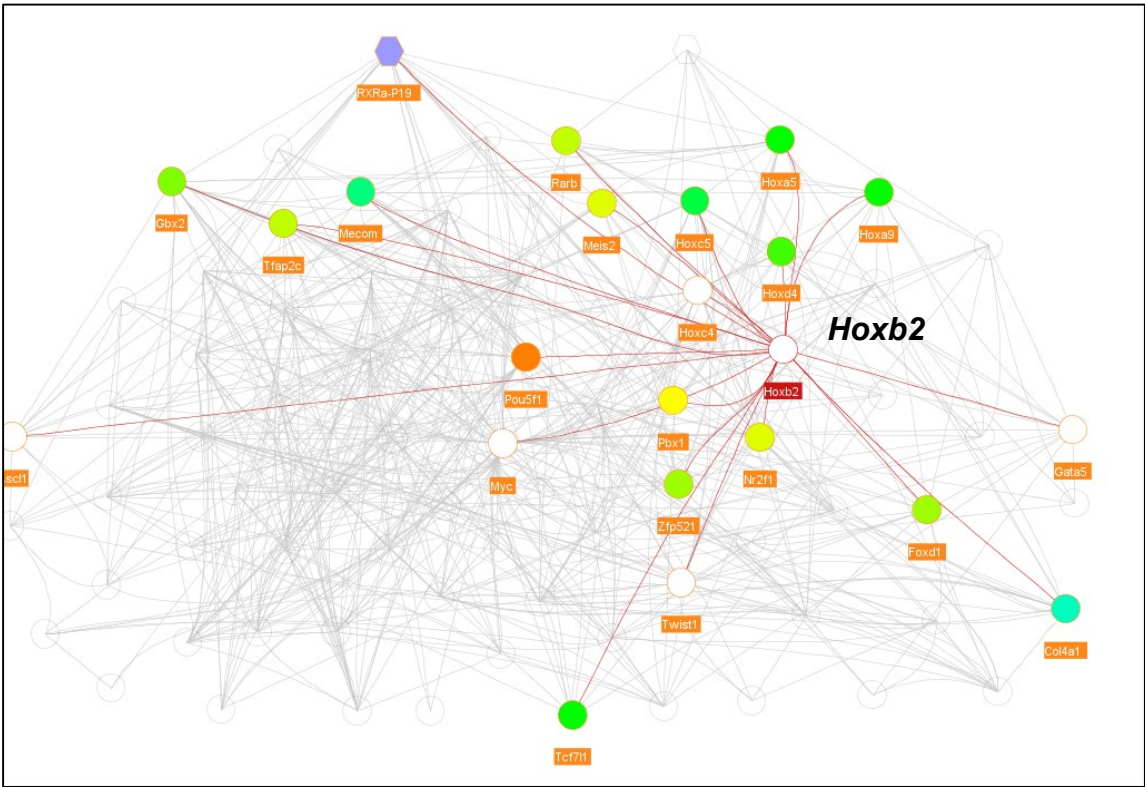

P

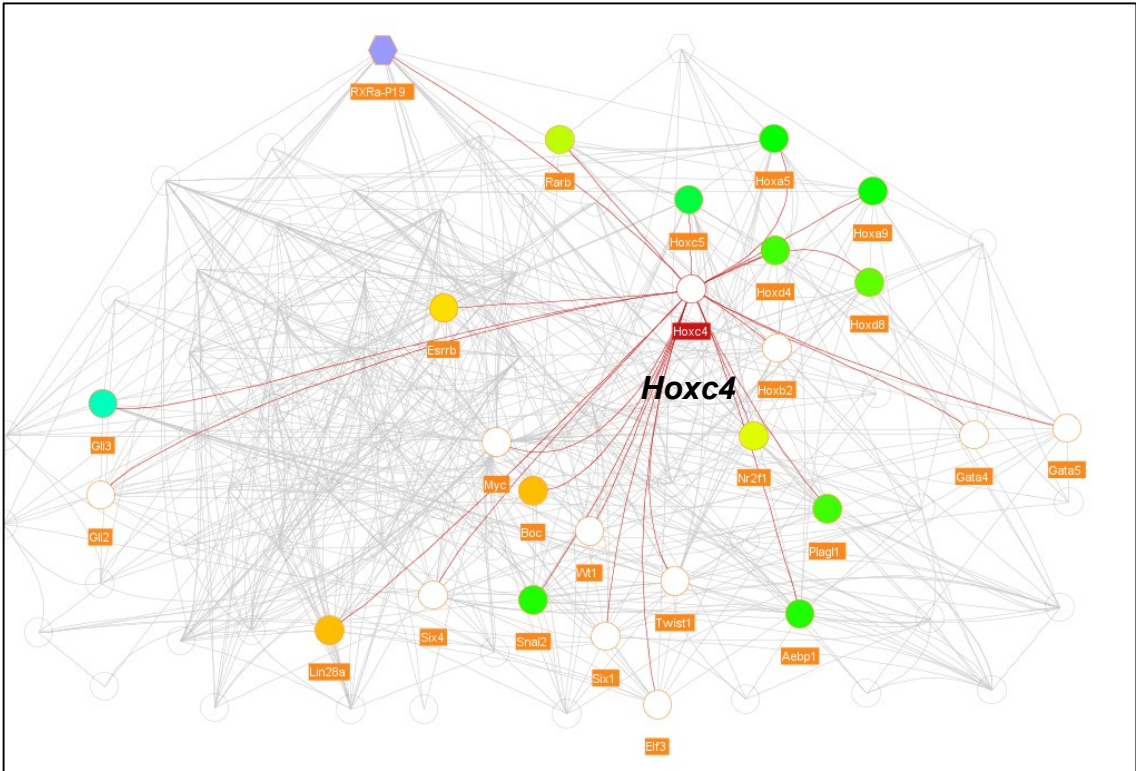

**Supplemental Figure S17. Gene regulatory wiring reconstructed from the reduced Gene regulatory network governing the RA-driven cell-fate decisions in F9 and P19 cells.**

Q

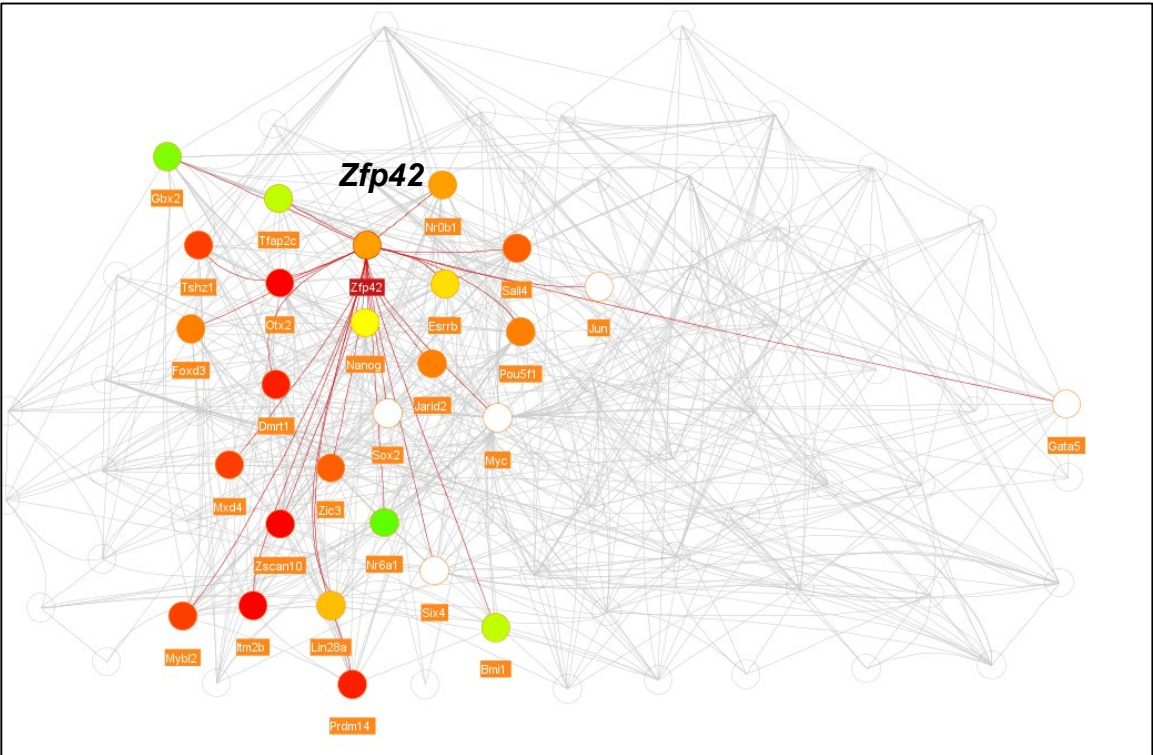

R

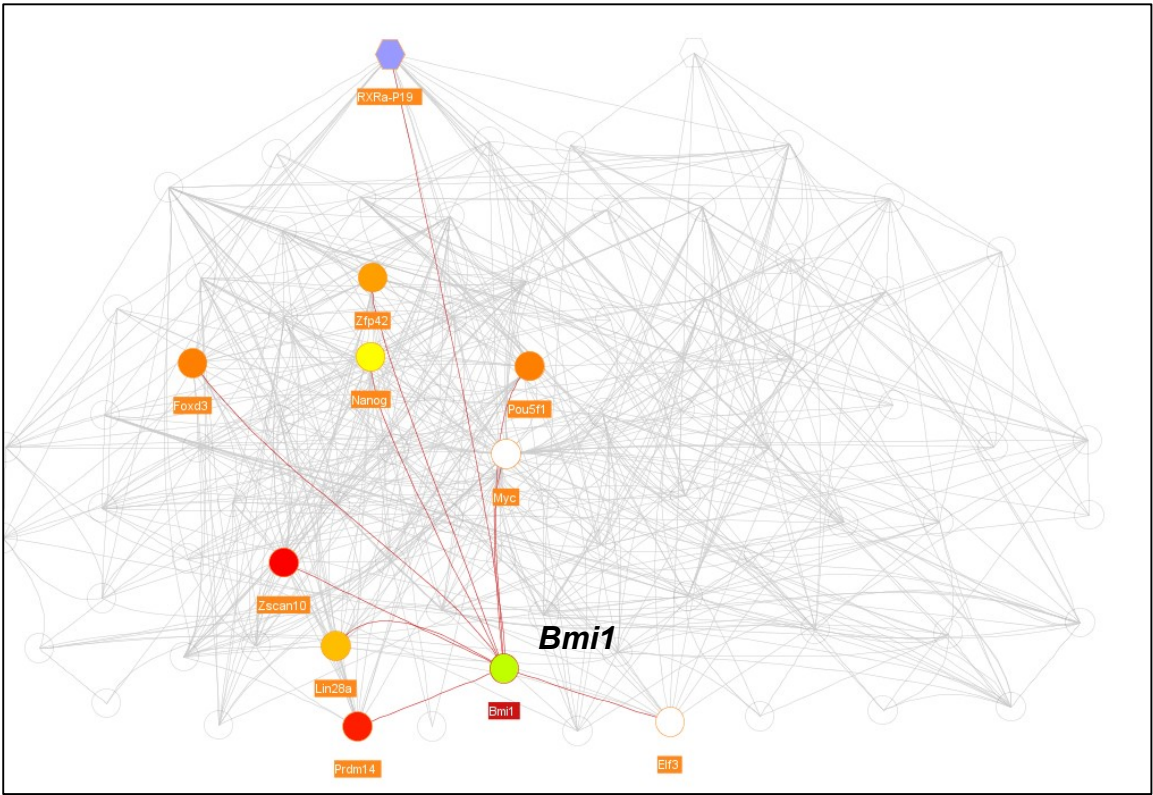



**Supplemental Figure S17. Gene regulatory wiring reconstructed from the reduced Gene regulatory network governing the RA-driven cell-fate decisions in F9 and P19 cells.**

S

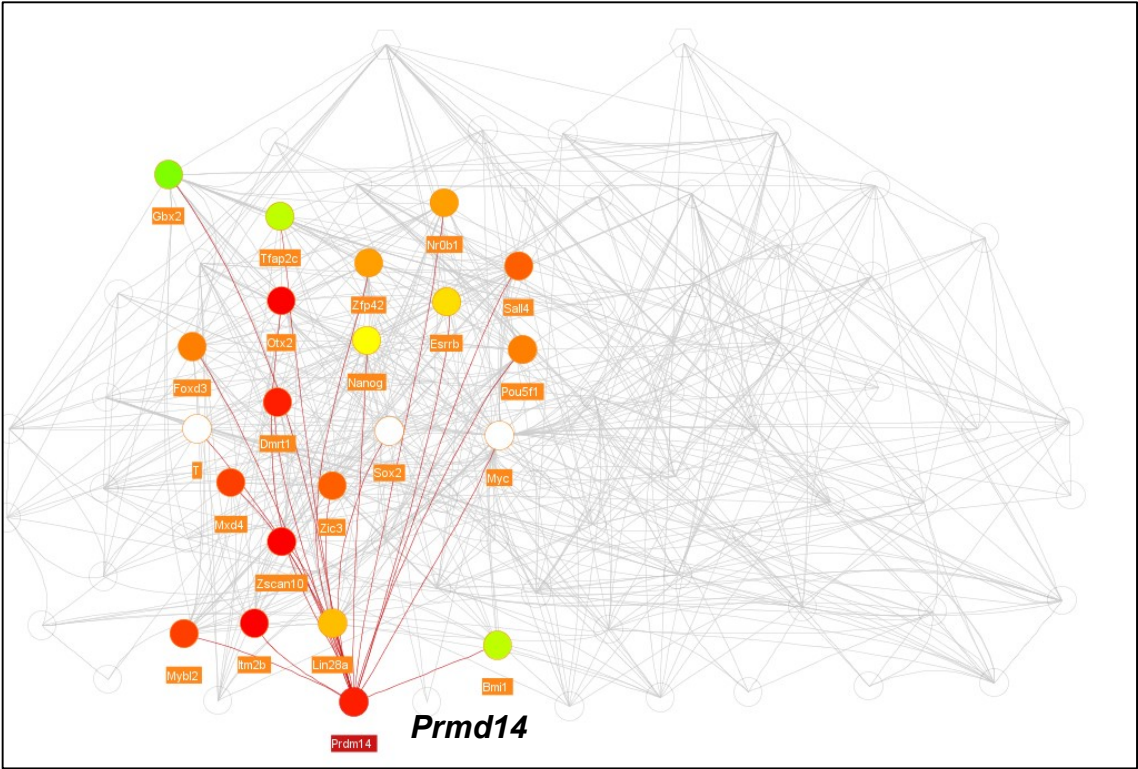

**Supplemental Figure S17. Gene regulatory wiring reconstructed from the reduced Gene regulatory network governing the RA-driven cell-fate decisions in F9 and P19 cells.**

U

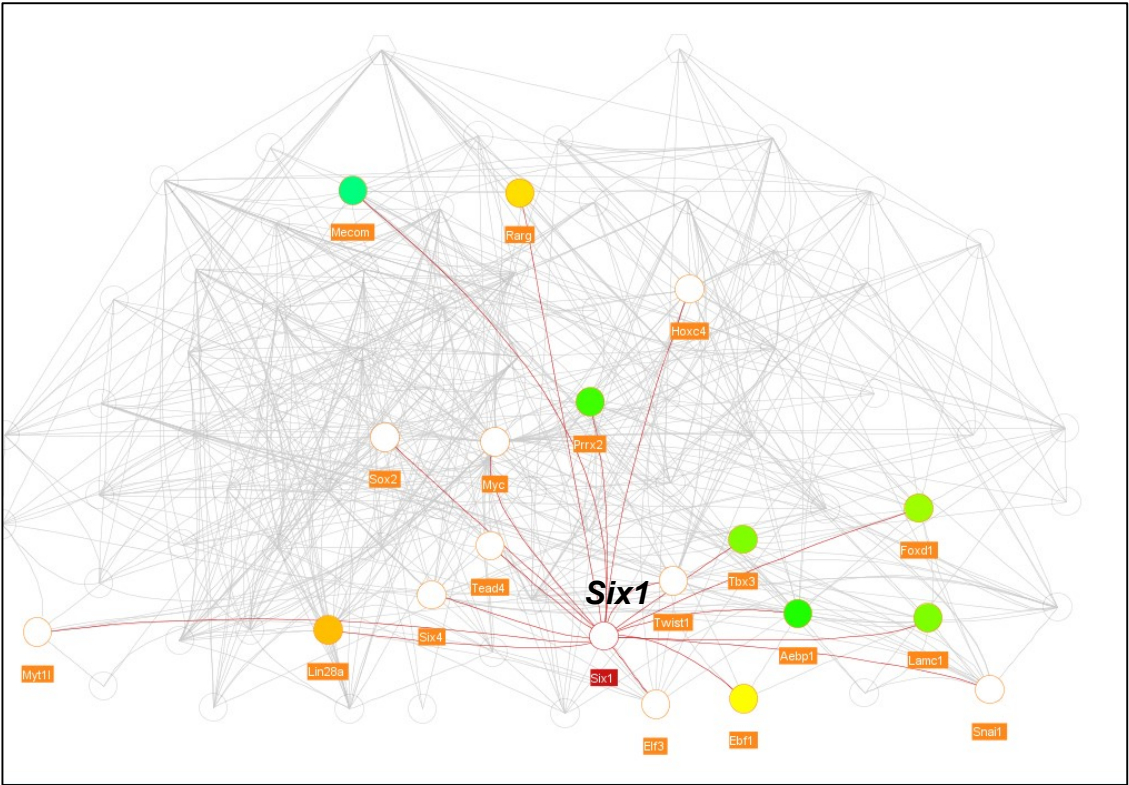

V

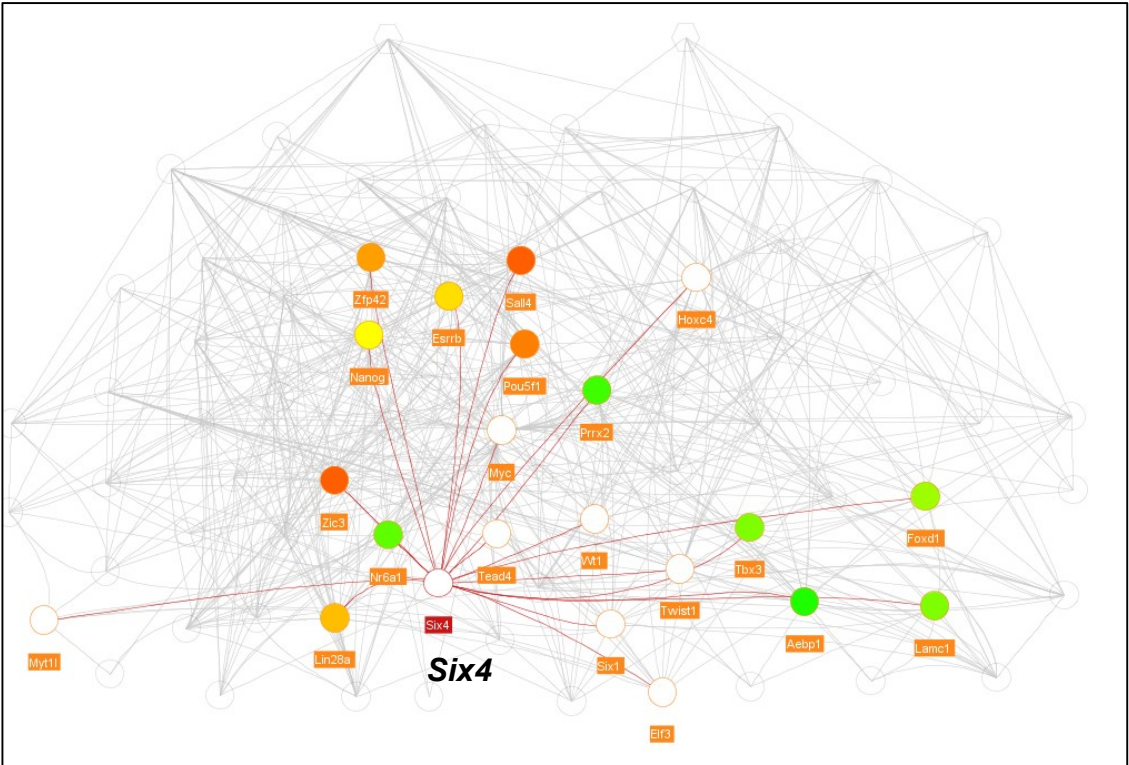



**Supplemental Figure S17. Gene regulatory wiring reconstructed from the reduced Gene regulatory network governing the RA-driven cell-fate decisions in F9 and P19 cells.**

W

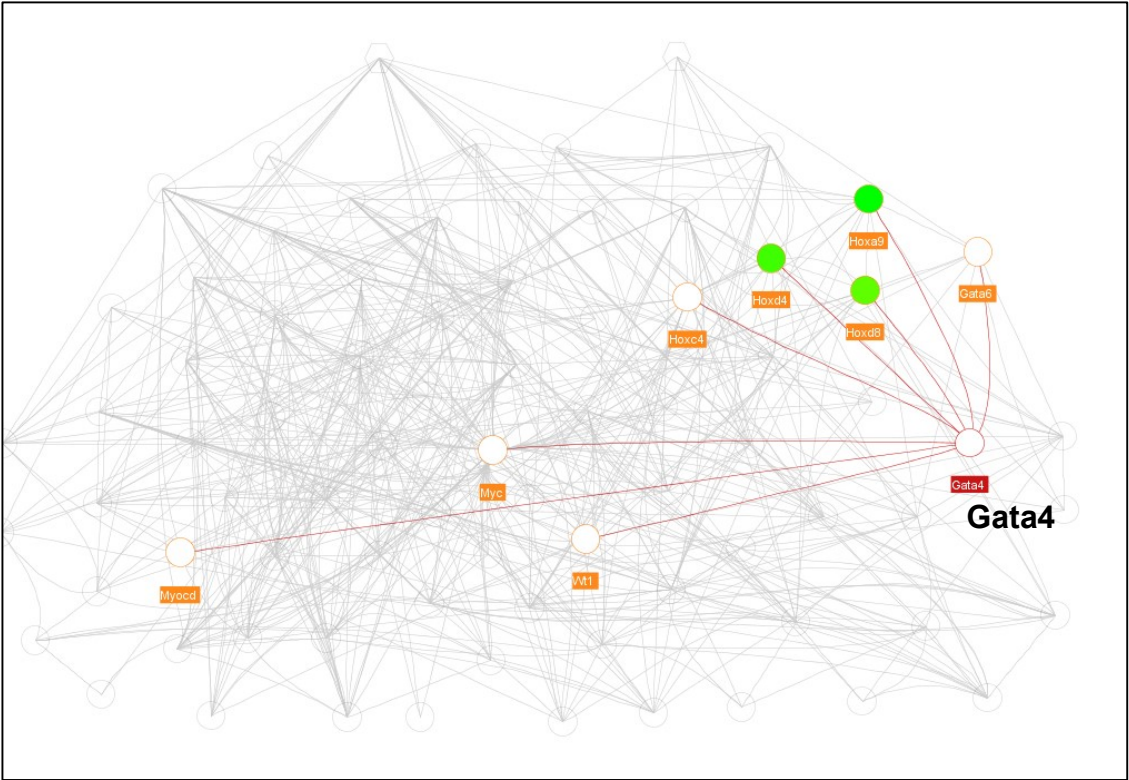

X

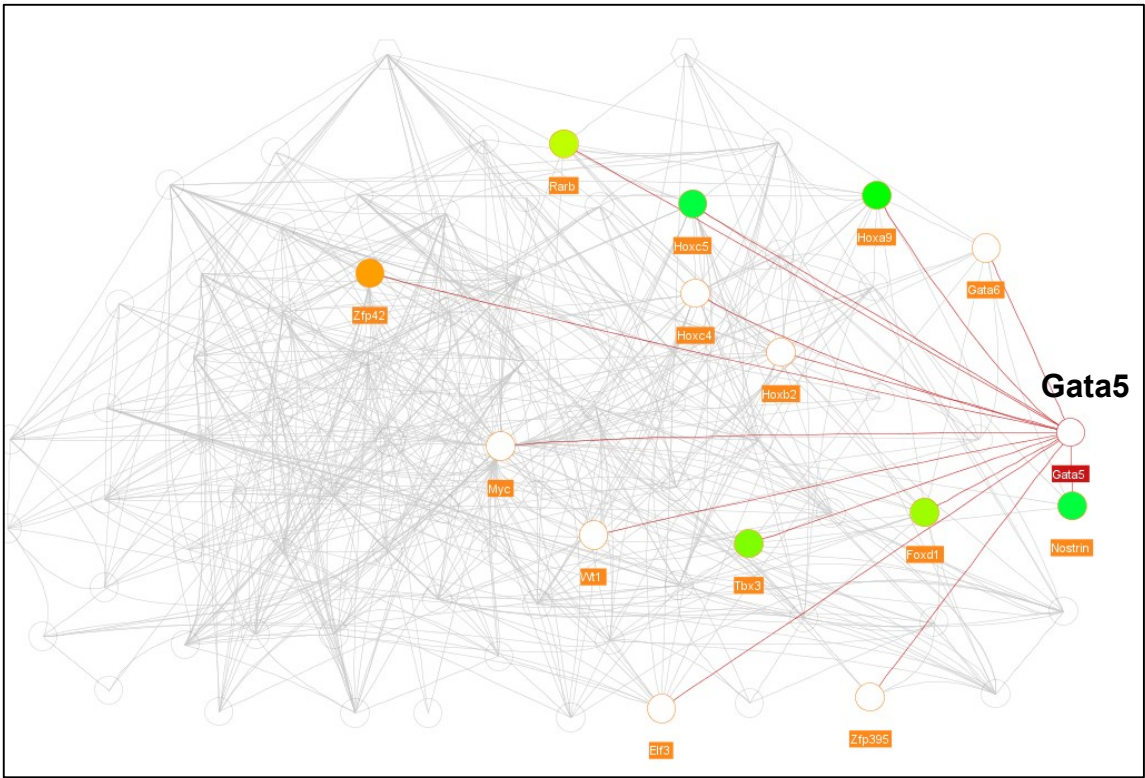

**Supplemental Figure S17. Gene regulatory wiring reconstructed from the reduced Gene regulatory network governing the RA-driven cell-fate decisions in F9 and P19 cells.** (A to X) Illustration of connectivity of RXR $\alpha$  (A, B) and downstream key regulatory genes (C, *Hoxa1*; D, *Rarb*; E, *Gbx2*; F, *Tal2*; G, *Meis2*; H, *Tshz1*; I, *Gli2*; J, *Pbx1*; K, *Ascl1*; L, *Lhx2*; M, *Sox2*; N, *Nr0b1*; O, *Hoxb2*; P, *Hoxc4*; Q, *Zfp42*; R, *Bmi1*; S, *Prmd14*; T, *Elf3*; U, *Six1*; V, *Six4*; W, *Gata4*; X, *Gata5*) with the neuronal, endodermal and common programs. Note that early RA-induced factors like RAR $\beta$  and HOXA1 are each interconnected with nodes projecting to endodermal and neuronal factors revealing their impact on the development of both the endodermal and the neuronal lineages (**Supplemental Fig. S17C, D**).

In the neuronal lineage, the early-induced transcription factors GBX2<sup>1</sup> and TAL2 are depicted by edges linking these factors specifically to the RXR $\alpha$ /RAR node of P19 cells. Further downstream, GBX2 is connected to pluripotency factors (SOX2, NANOG, SALL4 or POU5F1/OCT4), which correlates with its repressive activity depicted as part of the co-expression path 10 derived from DREM (**Figure 4D**); it is also linked to the neuronal fate determination factors POU3F4/BRN4 and ASCL1, as well as to the PBX-related homeobox factor MEIS2/STRA10<sup>2</sup>. Notably, an essential role of MEIS2 in neurogenesis has been recently reported<sup>3</sup>, in addition to its implication in cell cycle regulation<sup>4</sup> and cell fate specification<sup>5,6</sup>. The broad functionality of MEIS2 is also apparent from the number of its interactions in the reduced GRN (**Supplemental Fig. S17G**), which includes multiple HOX factors, PBX1 or the zinc finger protein 521(ZFP521) - all of which are expressed in both P19 and F9 cells - and with other neurogenesis-related TFs like GLI2, BRN2 or BRN4. GBX2 is also connected to TSHZ1, a homeodomain factor previously shown to regulate the development and maturation of the olfactory bulb<sup>7</sup>, and which we describe here as a new potential factor that promotes neuronal commitment (**Figure 6**). Indeed, TSHZ1 is connected to pluripotency regulators (SALL4, POU5F1, NANOG, NR0B1), but also to ZIC3 – a factor that plays a critical role in forebrain development<sup>8</sup> - and to the neural crest marker FOXD3<sup>9</sup>. With longer exposure to RA, P19 cells gain in expression of additional neuronal factors, among them ASCL1/MASH1, a factor that is essential for neuronal differentiation of P19 cells<sup>10,11</sup>. Importantly, ASCL1 is connected to several other neuronal-specific factors, such as GLI3, POU3F2/BRN2 or POU3F4/BRN4, as well as to LHX2, a transcriptional factor previously shown to play an essential role for retinal gliogenesis<sup>12</sup>. Note that we demonstrated that LHX2 is able to promote neuronal differentiation (**Figure 6**), which is in keeping with its connection to the downstream acting neuronal factors ASCL1, GLI3, POU3F2/BRN2 and POU3F4/BRN4 (**Supplemental Fig. S17L**). Among the factors involved in endodermal specification is ZFP42/REX1, which is expressed selectively in undifferentiated F9 cells. Notably, RA represses its expression in mouse stem cells<sup>13,14</sup> and its ablation impaired RA-induced primitive endodermal differentiation<sup>15</sup>. Furthermore, previous studies demonstrated that ZFP42/REX1 is regulated by NANOG and SOX2<sup>16,17</sup>. Notably, this described regulatory relationship with the self-renewal components NANOG, SOX2, KLF4 and OCT4 is recapitulated in the reduced GRN, as is its direct role in endodermal differentiation through interaction with BMI1 and the transcription factor PRDM14 (**Supplemental Fig. S17Q**). In fact, the Polycomb factor BMI1 is known to facilitate primitive endoderm formation through GATA6 stabilisation<sup>18</sup>, while PRDM14 is involved in the maintenance of the pluripotency and inhibits ES cells from adopting endodermal fates<sup>19</sup>. Another F9 cell-specific endodermal differentiation-related factor is the Ets domain TF ELF3<sup>20</sup>, which is a direct RA target gene that is also connected to the Homeobox TFs SIX1 and SIX4 (**Supplemental Fig. S17Q**); the latter are involved in pharyngeal endoderm formation<sup>21</sup>. Finally, the GRN contains the nodes GATA4 and GATA6, which are critical for endodermal differentiation<sup>22,23</sup>.

In summary, the reconstructed gene regulatory network properly reconstitutes a scenario in which cascades of TF-driven common regulatory programs - preferentially active during the first hours of treatment – in concert with temporally evolving, similarly TF-driven endodermal and neuronal programs are responsible for the acquisition of these two cell fates in distinct germ layers, such that cell fate specification is pre-defined by a given cellular context even when the same trigger is used for program initiation.

(1). Bouillet, P., Chazaud, C., Oulad-Abdelghani, M., Dolle, P. & Chambon, P. Sequence and expression pattern of the *Stra7* (*Gbx-2*) homeobox-containing gene induced by retinoic acid in P19 embryonal carcinoma cells. *Dev Dyn* **204**, 372-382 (1995).

(2). Oulad-Abdelghani, M. *et al.* *Meis2*, a novel mouse *Pbx*-related homeobox gene induced by retinoic acid during differentiation of P19 embryonal carcinoma cells. *Dev Dyn* **210**, 173-183 (1997).



- (3). Agoston, Z. *et al.* Meis2 is a Pax6 co-factor in neurogenesis and dopaminergic periglomerular fate specification in the adult olfactory bulb. *Development* **141**, 28-38 (2014).
- (4). Zha, Y. *et al.* MEIS2 is essential for neuroblastoma cell survival and proliferation by transcriptional control of M-phase progression. *Cell death & disease* **5**, e1417 (2014).
- (5). Agoston, Z., Li, N., Haslinger, A., Wizenmann, A. & Schulte, D. Genetic and physical interaction of Meis2, Pax3 and Pax7 during dorsal midbrain development. *BMC Dev Biol* **12**, 10 (2012).
- (6). Agoston, Z. & Schulte, D. Meis2 competes with the Groucho co-repressor Tle4 for binding to Otx2 and specifies tectal fate without induction of a secondary midbrain-hindbrain boundary organizer. *Development* **136**, 3311-3322 (2009).
- (7). Ragancokova, D. *et al.* TSHZ1-dependent gene regulation is essential for olfactory bulb development and olfaction. *J Clin Invest* **124**, 1214-1227 (2014).
- (8). Inoue, T., Ota, M., Ogawa, M., Mikoshiba, K. & Aruga, J. Zic1 and Zic3 regulate medial forebrain development through expansion of neuronal progenitors. *J Neurosci* **27**, 5461-5473 (2007).
- (9). Dottori, M., Gross, M. K., Labosky, P. & Goulding, M. The winged-helix transcription factor Foxd3 suppresses interneuron differentiation and promotes neural crest cell fate. *Development* **128**, 4127-4138 (2001).
- (10). Huang, H. S. *et al.* Transcriptional Regulatory Events Initiated by Ascl1 and Neurog2 During Neuronal Differentiation of P19 Embryonic Carcinoma Cells. *J Mol Neurosci* (2014).
- (11). Huang, H. S., Turner, D. L., Thompson, R. C. & Uhler, M. D. Ascl1-induced neuronal differentiation of P19 cells requires expression of a specific inhibitor protein of cyclic AMP-dependent protein kinase. *J Neurochem* **120**, 667-683 (2012).
- (12). de Melo, J. *et al.* Lhx2 Is an Essential Factor for Retinal Gliogenesis and Notch Signaling. *J Neurosci* **36**, 2391-2405 (2016).
- (13). Hosler, B. A., Rogers, M. B., Kozak, C. A. & Gudas, L. J. An octamer motif contributes to the expression of the retinoic acid-regulated zinc finger gene Rex-1 (Zfp-42) in F9 teratocarcinoma cells. *Mol Cell Biol* **13**, 2919-2928 (1993).
- (14). Hosler, B. A., LaRosa, G. J., Grippo, J. F. & Gudas, L. J. Expression of REX-1, a gene containing zinc finger motifs, is rapidly reduced by retinoic acid in F9 teratocarcinoma cells. *Mol Cell Biol* **9**, 5623-5629 (1989).
- (15). Thompson, J. R. & Gudas, L. J. Retinoic acid induces parietal endoderm but not primitive endoderm and visceral endoderm differentiation in F9 teratocarcinoma stem cells with a targeted deletion of the Rex-1 (Zfp-42) gene. *Mol Cell Endocrinol* **195**, 119-133 (2002).
- (16). Shi, W. *et al.* Regulation of the pluripotency marker Rex-1 by Nanog and Sox2. *The Journal of biological chemistry* **281**, 23319-23325 (2006).
- (17). Son, M. Y., Choi, H., Han, Y. M. & Cho, Y. S. Unveiling the critical role of REX1 in the regulation of human stem cell pluripotency. *Stem Cells* **31**, 2374-2387 (2013).
- (18). Lavial, F. *et al.* Bmi1 facilitates primitive endoderm formation by stabilizing Gata6 during early mouse development. *Genes Dev* **26**, 1445-1458 (2012).
- (19). Ma, Z., Swigut, T., Valouev, A., Rada-Iglesias, A. & Wysocka, J. Sequence-specific regulator Prdm14 safeguards mouse ESCs from entering extraembryonic endoderm fates. *Nat Struct Mol Biol* **18**, 120-127 (2011).
- (20). Hou, J. *et al.* Transcriptional regulation of the murine Elf3 gene in embryonal carcinoma cells and their differentiated counterparts: requirement for a novel upstream regulatory region. *Gene* **340**, 123-131 (2004).
- (21). Zou, D. *et al.* Patterning of the third pharyngeal pouch into thymus/parathyroid by Six and Eya1. *Dev Biol* **293**, 499-512 (2006).
- (22). Capo-Chichi, C. D. *et al.* Alteration of Differentiation Potentials by Modulating GATA Transcription Factors in Murine Embryonic Stem Cells. *Stem Cells Int* **2010**, 602068 (2010).
- (23). Futaki, S., Hayashi, Y., Emoto, T., Weber, C. N. & Sekiguchi, K. Sox7 plays crucial roles in parietal endoderm differentiation in F9 embryonal carcinoma cells through regulating Gata-4 and Gata-6 expression. *Mol Cell Biol* **24**, 10492-10503 (2004).
